# **The subthalamic nucleus contributes causally to perceptual decision-making in monkeys**

Kathryn Rogers, Joshua I. Gold, Long Ding\*

Department of Neuroscience, University of Pennsylvania, Philadelphia, PA 19104

\* Corresponding author ([lding@penncmedicine.upenn.edu](mailto:lding@penncmedicine.upenn.edu))

## 1 **Abstract**

2 The subthalamic nucleus (STN) plays critical roles in the motor and cognitive function of the  
3 basal ganglia (BG), but the exact nature of these roles is not fully understood, especially in the  
4 context of decision-making based on uncertain evidence. Guided by theoretical predictions of  
5 specific STN contributions, we used single-unit recording and electrical microstimulation in the  
6 STN of healthy monkeys to assess its causal, computational roles in visual-saccadic decisions  
7 based on noisy evidence. The recordings identified subpopulations of STN neurons with distinct  
8 task-related activity patterns that related to different theoretically predicted functions.  
9 Microstimulation caused changes in behavioral choices and response times that reflected  
10 multiple contributions to an “accumulate-to-bound”-like decision process, including modulation  
11 of decision bounds and evidence accumulation, and to non-perceptual processes. These results  
12 provide new insights into the multiple ways that the STN can support higher brain function.

13

14

## 15 **Introduction**

16 The subthalamic nucleus (STN) is a critical junction in both the indirect and hyperdirect  
17 pathways of the basal ganglia (BG). It receives inputs from the external segment of the globus  
18 pallidum (GPe) and cortex and sends diffuse excitation to pallidal output nuclei of the BG. The  
19 STN has well-recognized functions in movement control. For example, in humans and monkeys,  
20 lesions of the STN cause involuntary movements of contralateral body parts (Martin, 1927;  
21 Martin and Alcock, 1934; Whittier and Mettler, 1949; Carpenter et al., 1950). In monkeys with  
22 experimentally induced Parkinsonism, STN lesions and inactivation can reverse abnormal BG  
23 output activity and alleviate both akinesia and rigidity (Bergman et al., 1990, 1994; Wichmann et  
24 al., 1994a). In Parkinsonian human patients, deep brain stimulation (DBS) of the STN has  
25 become a common treatment option to alleviate movement abnormalities (DeLong and  
26 Wichmann, 2001).

27 Recognizing that motor symptoms associated with STN damage are often accompanied by  
28 emotional and cognitive deficits, recent work has also begun to examine the roles of the STN in  
29 cognition. For example, the STN has been shown to contribute to cued, goal-driven action  
30 inhibition (Baunez et al., 2001; Desbonnet et al., 2004; Witt et al., 2004; Aron and Poldrack,  
31 2006; Frank et al., 2007; Isoda and Hikosaka, 2008; Schmidt et al., 2013; Pasquereau and Turner,  
32 2017). STN activity can also be sensitive to task complexity and decision conflict, as measured  
33 in imaging studies and human patients undergoing DBS (Lehericy et al., 2004; Aron et al., 2007;  
34 Fumagalli et al., 2011; Brittain et al., 2012; Zaghoul et al., 2012; Zavala et al., 2017). These  
35 findings have led to the idea that STN may also contribute to resolving difficult decisions based  
36 on uncertain evidence. This idea has been formalized in several computational models, which  
37 posit three, not mutually exclusive, functions for STN: 1) in coordination with the medial  
38 prefrontal cortex, STN adjusts decision bounds (i.e., thresholds on accumulated evidence that  
39 govern decision termination and commitment) to control impulsivity in responding (Frank, 2006;  
40 Cavanagh et al., 2011; Ratcliff and Frank, 2012; Zavala et al., 2014; Herz et al., 2016, 2017; Pote

41 et al., 2016); 2) through its interaction with GPe, STN computes a normalization signal to  
 42 calibrate how the available, alternative options are assessed (Bogacz and Gurney, 2007;  
 43 Coulthard et al., 2012; Green et al., 2013); and 3) by maintaining the balance between the direct  
 44 and indirect pathways of the BG, STN helps to implement a nonlinear computation that improves  
 45 the efficacy with which the BG adjusts decision bounds (Lo and Wang, 2006; Wei et al., 2015).

46 Guided by predictions of these models (Figure 1B), we assessed the role of the STN in decisions  
 47 made by monkeys performing a random-dot visual motion direction discrimination task (Figure.  
 48 1A). We recorded from individual STN neurons while monkeys performed the task and found  
 49 activity patterns that were highly heterogenous across neurons. Nevertheless, these patterns  
 50 could be sorted into three prominent clusters with functional properties that, in principle, could  
 51 support each of the three theoretically predicted STN functions from previous modeling studies.  
 52 In addition, we tested STN's causal contribution to the decision process using electrical  
 53 microstimulation. These perturbations of STN activity affected both choice and reaction time  
 54 (RT) performance in multiple ways that could be ascribed to particular computational  
 55 components of an “accumulate-to-bound” decision process. As detailed below, these results show  
 56 that STN can play multiple, causal roles in the formation of a deliberative perceptual decision,  
 57 likely reflecting its diverse contributions to the many cognitive and motor functions that depend  
 58 on the BG.

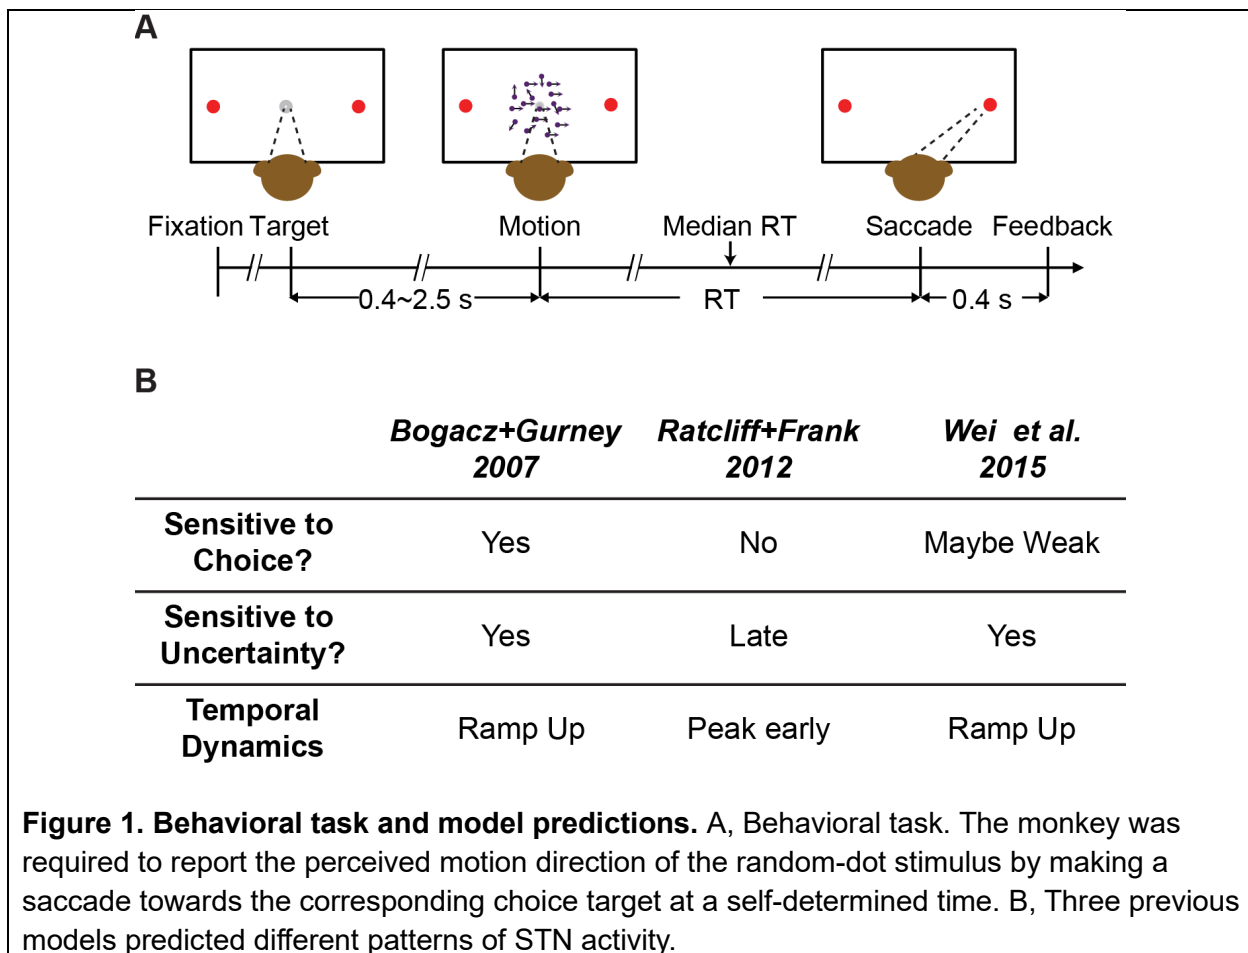

## 59 **Results**

### 60 **STN neurons show diverse response profiles**

61 We recorded 203 neurons while the monkeys were performing a random-dot motion  
62 discrimination task ( $n = 115$  and  $88$  for monkeys C and F, respectively). The behavioral  
63 performance of both monkeys has been documented extensively (Ding and Gold, 2010, 2012a;  
64 Fan et al., 2018). Their performance in three example sessions are shown in Figure 4A–C (black  
65 data points). In general, both monkeys made more contralateral choices with increasing signed  
66 motion strength (positive for motion toward the contralateral target) and had lower RTs (i.e.,  
67 faster responses) for higher absolute motion strength.

68 STN neurons showed diverse response profiles. Figure 2A shows average activity patterns of  
69 three example neurons. The top neuron showed an initial suppression of activity after motion  
70 onset and became active, in a choice-dependent manner, before saccade onset. The middle  
71 neuron showed choice- and motion coherence-dependent activation during the motion-viewing  
72 period before saccade onset. The bottom neuron exhibited activation after motion onset that was  
73 similar for both choices and all coherence levels, which then decayed in a choice- and coherence-  
74 dependent manner around saccade onset.

75 The diversity of response profiles can be seen in the summary heatmaps for the population  
76 (Figure 2B). When activity was averaged across all trial types, STN neurons can become  
77 activated or suppressed (warm vs. cool colors, respectively), relative to pre-stimulus baseline,  
78 during motion viewing and around saccade onset. The timing of peak modulation also spanned  
79 the entire motion-viewing period and extended beyond saccade generation, including a  
80 substantial fraction of neurons that also responded to target onset before the motion stimulus  
81 appeared. These diverse spatiotemporal response profiles suggest that the STN as a whole may  
82 serve multiple functions in perceptual decision-making.

83 Across the population, a substantial fraction of neurons was sensitive to choice, motion  
84 coherence, and RT (Figure 2C-E, Supplemental Figure 1). We performed multiple linear  
85 regressions, separately for coherence and RT (Eqs. 1 and 2), for each neuron and used the  
86 regression coefficients to measure these decision-related sensitivities. For choice sensitivity  
87 (Figure 2C, first row), both contralateral and ipsilateral preferences were commonly observed.

88 The overall fraction of neurons showing choice sensitivity increased after motion onset and  
89 peaked at saccade onset (Figure 2D). For coherence sensitivity, modulations were observed for  
90 trials with contralateral or ipsilateral choices and with similar tendencies for positive and  
91 negative coefficients (Figure 2C, rows 2 and 3). The fraction of neurons showing reliable  
92 coherence sensitivity was also higher around saccade onset (Figure 2D).

93 Despite the diverse distributions of regression coefficients, there were systematic patterns in  
94 when and how these forms of selectivity were evident in the neural responses. Notably, neurons  
95 showing choice sensitivity were more likely to show coherence modulation during early motion  
96 viewing, especially for trials when the monkey chose the neuron's preferred choice (Figure 2E,  
97 purple). In contrast, coherence modulation emerged later for neurons that did not show choice

98 sensitivity (Figure 2E, gray lines). These systematic interactions in modulation types suggest that  
 99 the STN population does not simply reflect a random mix of selectivity for decision-related  
 100 quantities. Instead, there appears to exist subpopulations with distinct decision-related  
 101 modulation patterns, which we detail below.

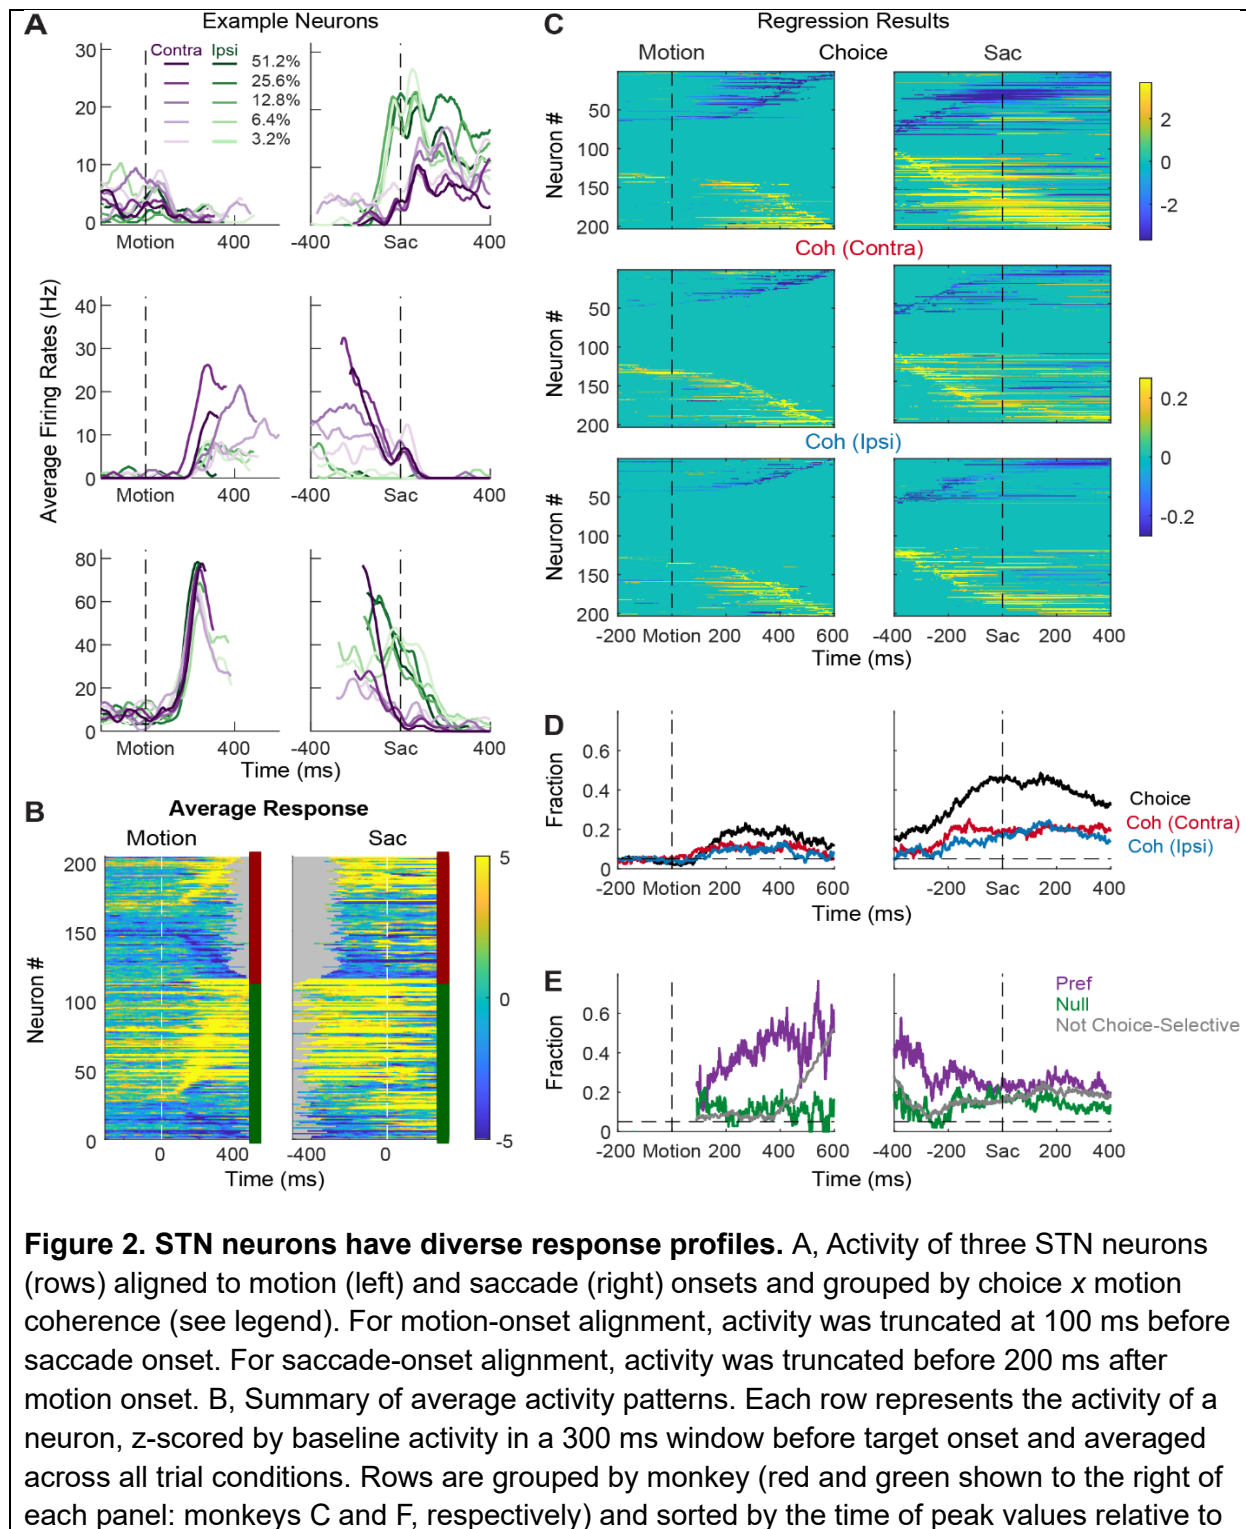

motion onset. Only correct trials were included. C, Heatmaps of linear regression coefficients for choice (top), coherence for trials with contralateral choices (middle), and coherence for trials with ipsilateral choices (bottom), for activity aligned to motion (left) and saccade (right) onsets. Regression was performed in running windows of 300 ms. Regression coefficients that were not significantly different from zero ( $t$ -test,  $p > 0.05$ ) were set to zero (green) for display purposes. Neurons were sorted in rows by the time of peak coefficient magnitude. Only correct trials were included. D, Time courses of the fractions of regression coefficients that were significantly different from zero ( $t$ -test,  $p < 0.05$ ), for choice (black), coherence for trials with contralateral choices (red), and coherence for trials with ipsilateral choices (blue). Dashed line indicates chance level. E, Time courses of the fractions of non-zero regression coefficients for coherence. Separate fractions were calculated for trials with the preferred (purple) and null (green) choices from choice-selectivity activity and for all trials from activity that was not choice selective (gray). Only time points after motion onset with fractions  $> 0.05$  for choice-selective activity were included. Dashed line: chance level.

102

### 103 ***STN subpopulations can support previously theorized functions***

104 Using two forms of cluster analysis, we identified three subpopulations of neurons in the STN  
105 with distinct activity patterns that conform to predictions of each of the three previously  
106 published sets of models. For the first analysis, we represented a neuron's activity pattern with a  
107 30-dimension vector, consisting of normalized average activity associated with two choices, five  
108 coherence levels, and three task epochs. We generated three artificial vectors based on the  
109 predicted activity patterns of each model, as follows (Figure 3A). Bogacz and Gurney (2007)  
110 posited that STN neurons, through their reciprocal connections with the external segment of  
111 globus pallidum, pool and normalize evidence-related signals, leading to the prediction of choice  
112 and coherence-modulated activity during motion viewing (Figure 3A, top). Ratcliff and Frank  
113 (2012) posited that STN neurons, through their direct innervation by cortical regions, provide an  
114 early signal to suppress immature choices, leading to the prediction of a choice-independent  
115 signal that appears soon after motion onset and dissipates over time (Figure 3A, middle). Wei  
116 and colleagues (2015) posited that the STN balances evidence-related signals in the GPe until  
117 near decision time, leading to the prediction of coherence-dependent ramping activity with no or  
118 weak choice selectivity (Figure 3A, bottom). We performed k-means clustering using these three  
119 vectors and another arbitrary vector as the seeds to group the population into four clusters.

120 Figure 3B shows the average activity from each of the resulted clusters. Consistent with the  
121 design of this analysis, the average activity of the first cluster shows choice- and coherence-  
122 dependent activity that also ramps up during motion viewing. The average activity of the second  
123 cluster shows an early, sharper rise in activity that is modulated by neither choice or coherence  
124 during motion viewing and this activity gradually decreases toward saccade onset. The average  
125 activity of the third cluster shows choice- and coherence-dependent ramping activity during  
126 motion viewing and a short burst of activity for one choice just before saccade onset. The last  
127 cluster shows little task-related modulation. The first three clusters contained similar numbers of  
128 neurons. When visualized using the T-distributed stochastic neighbor embedding technique, these  
129 clusters did not form a single continuum but instead reflected separable features between clusters

130 (Figure 3C). In other words, the clustering did not simply force a uniform distribution with  
 131 random-mixed selectivity into four groups.

132 For the second cluster analysis, we used random seeds without considering any of the model  
 133 predictions and obtained almost identical clusters. As detailed in Methods, we explored a wide  
 134 range of settings for clustering, including: 1) using directly the 30-D vectors or their principal

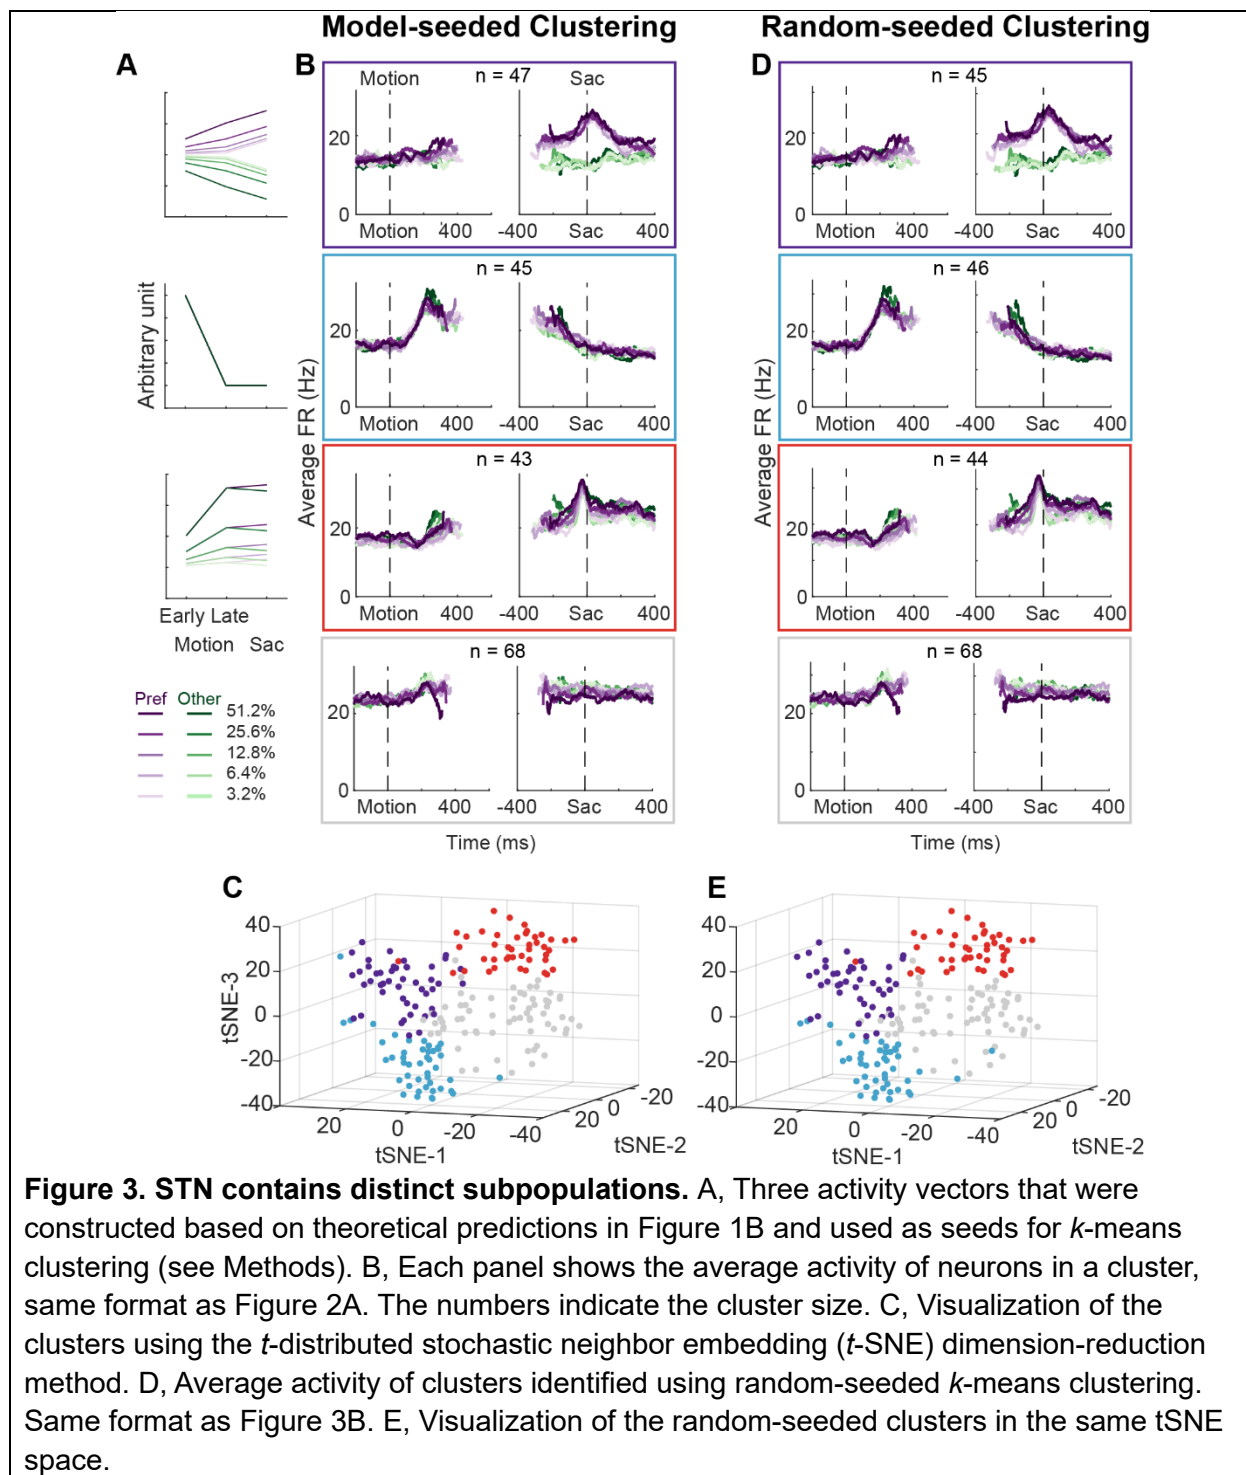

135 component projections, 2) basing the clustering on three different distance metrics, and 3)  
136 varying the number of presumed clusters. To identify the best setting, we assessed the goodness  
137 of clustering using the silhouette score, which quantifies for each member the relative distance  
138 between its average within-cluster distance and distance to those in its closest neighboring  
139 cluster (a higher score indicates better cluster separation). The silhouette plots favored the  
140 combination of using the 30-D vector directly and correlation distance (Supplemental Figure  
141 2A), which generated less variability across clusters and few/small-magnitude negative  
142 silhouette scores (negative scores indicate that a member is closer to its neighboring cluster than  
143 its own cluster).

144 We assessed the stability of clustering using the Rand index (Rand, 1971), which measures how  
145 consistently two members are assigned to the same clusters from different iterations of clustering  
146 (a high index indicates greater stability). The Rand index was generally high (above 0.95 out of a  
147 max of 1) except for the combination of using the 30-D vector and cosine distance  
148 (Supplemental Figure 2B). Finally, using the raw vector-correlation combination, an assumption  
149 of four clusters resulted in the highest average Rand index and assuming 4-6 clusters generally  
150 resulted in higher mean silhouette score and lower number of negative scores (Supplemental  
151 Figure 2C). We thus considered that the raw-vector-correlation combination and an assumption  
152 of four clusters produced the most stable and plausible results.

153 As shown in Figure 3D and E, the four clusters thus identified closely matched those obtained  
154 using model predicted seeds, in terms of the average activity, the cluster sizes, and their locations  
155 in the tSNE space. Increasing the assumed number of clusters caused changes mostly in the gray  
156 cluster, with some changes in the blue cluster, and little effects on the red and purple clusters  
157 (Supplemental Figure 3). Together these results suggest that, absent the ground truth on the  
158 number of subpopulations in STN, there exist at least three subpopulations that each corresponds  
159 to the predictions of one of three previous published models. As a consequence, STN appears in  
160 principle to be able to support multiple decision-related functions.

161

### 162 **Perturbation of STN activity affects choice and RT**

163 To better understand STN's functional roles in the decision process, we perturbed STN activity  
164 using electrical microstimulation while monkeys performed the task. Specifically, we applied a  
165 train of current pulses at identified STN sites during decision formation, lasting from motion  
166 onset to saccade onset. Figure 4 shows microstimulation effects on choices and RTs in three  
167 example sessions. In the first example session, STN microstimulation caused a leftward  
168 horizontal shift (more contralateral choices) and slope reduction (more variable choices) in the  
169 psychometric curve (Figure 4A, top), as well as a substantial flattening of RT curves (faster  
170 responses that depended less on motion coherence) for both choices (bottom). In the second  
171 example session, STN microstimulation induced a minor leftward shift in the psychometric curve  
172 and asymmetric changes in RT for the two choices (Figure 4B). In the third example session,  
173 STN microstimulation did not change the psychometric curve but caused reductions in RT for  
174 both choices (Figure 4C).



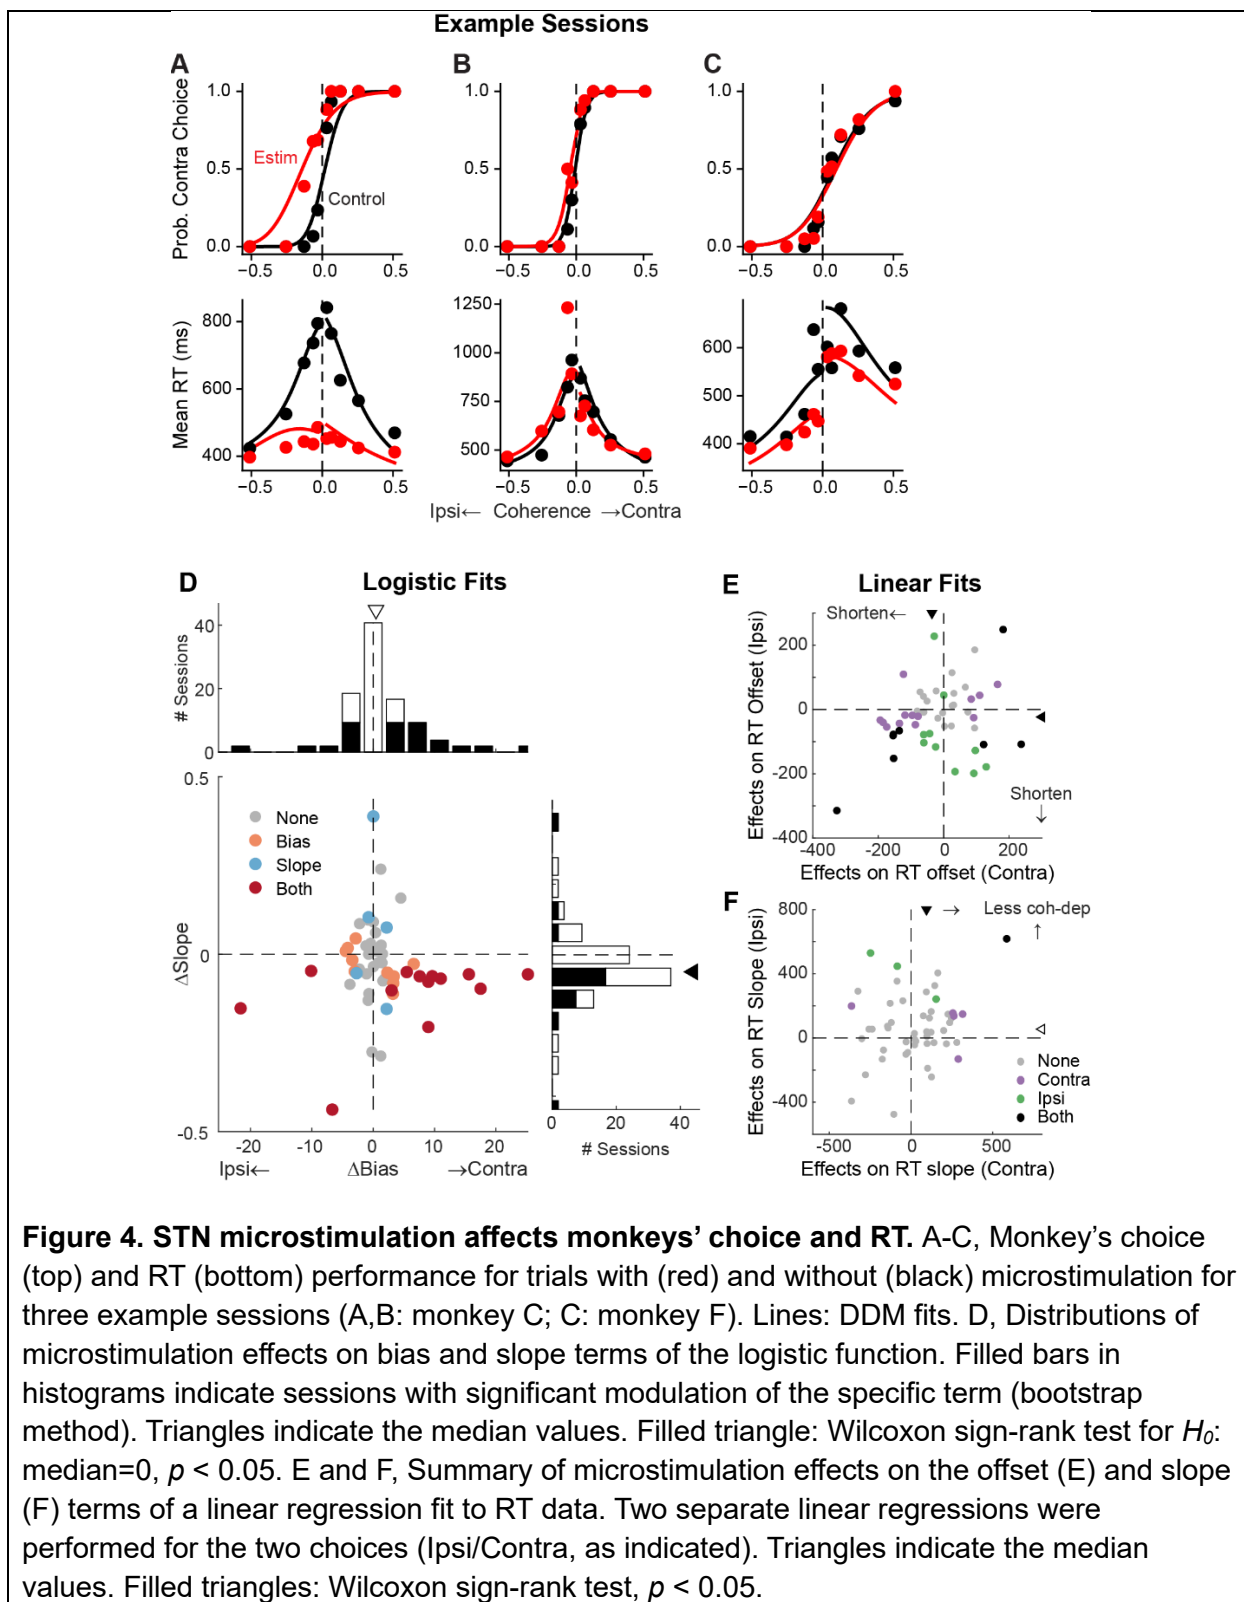

175 Across 54 different STN sites, microstimulation caused variable choice biases and tended to  
 176 reduce the dependence of choice on motion strength. We fitted the choice data to a logistic

177 function and measured choice bias (horizontal shift) and motion strength-dependence (slope). In  
178 23 sessions, microstimulation induced a reliable choice bias (Figure 4D). The induced bias was  
179 toward the contralateral or ipsilateral choice in 15 and 8 sessions, respectively, and the median  
180 value for bias was not significantly different from zero (Wilcoxon sign-rank test,  $p = 0.15$ ). In 18  
181 sessions, microstimulation induced a change in the slope. The slope was reduced in 15 sessions  
182 and the median value was negative ( $p = 0.008$ ). These tendencies were robust across different  
183 variants of logistic functions (Supplemental Figure 4). Of the sessions where inclusion of lapse  
184 terms for the control and microstimulation trials produced lower AICs, very few showed  
185 significant microstimulation-induced changes in lapses (2 sessions each for the “Symmetric  
186 Lapse” and “Asymmetric Lapse” variants). Thus, based on fitting results using logistic functions,  
187 STN microstimulation most consistently reduced the choice dependence on motion strength,  
188 caused session-specific choice biases, and had minimal effects on lapses.

189 Microstimulation also tended to reduce RT. We fitted linear functions separately for RTs  
190 associated with the two choices, in which offset and slope terms measure coherence-independent  
191 and -dependent changes in RTs, respectively. Microstimulation caused changes in RT offsets in  
192 25 sessions for contralateral choices (18 were reductions in RT, with a median change across all  
193 sessions of -36 ms; Wilcoxon sign-rank test for  $H_0$ : median change=0,  $p < 0.0001$ ) and 18  
194 sessions for ipsilateral choices (15 reductions, mean change = -23 ms,  $p < 0.0001$ ; Figure 4E).  
195 Microstimulation caused changes in RT slopes in 6 sessions for contralateral choices (5 were  
196 positive, implying a weaker coherence dependence;  $p < 0.0001$ ) and 4 sessions for ipsilateral  
197 choices (all 4 were positive; Figure 4F). Thus, based on fitting results using linear functions,  
198 STN microstimulation can induce choice-specific changes in RT, with overall tendencies to  
199 reduce both the coherence-independent component and the RT’s dependence on coherence for  
200 the contralateral choice.

201

## 202 **Microstimulation effects reflected changes in multiple computational components**

203 To infer STN’s computational roles in the decision process, we examined the microstimulation  
204 effects using a drift-diffusion model (DDM) framework. This framework has been widely used in  
205 studies of perceptual decision-making and can provide a unified, computational account of both  
206 choice and RT (Gold and Shadlen, 2007). It assumes that noisy evidence is accumulated over  
207 time and a decision is made when the accumulated evidence reaches a certain decision bound.  
208 The overall RT is the sum of the time needed to reach the bound and non-decision times  
209 reflecting perceptual and motor latencies. Previous theoretical models also made predictions  
210 about the effects of perturbing STN activity that can be interpreted in the DDM framework. The  
211 model by Bogacz and Gurney (2007) predicted that the perturbation would reduce the effect of  
212 task difficulty on decision performance by eliminating a nonlinear transformation that is needed  
213 for appropriate evidence accumulation (Green et al., 2013). The model by Ratcliff and Frank  
214 (2012) predicted that the perturbation, by causing changes in the STN’s influence onto the  
215 substantia nigra pars reticulata (SNr), would change temporal dynamics of the decision bound  
216 and influence non-decision time. The model by Wei and colleagues (2015) predicted that the  
217 perturbation would result in a reduction in the decision bound.

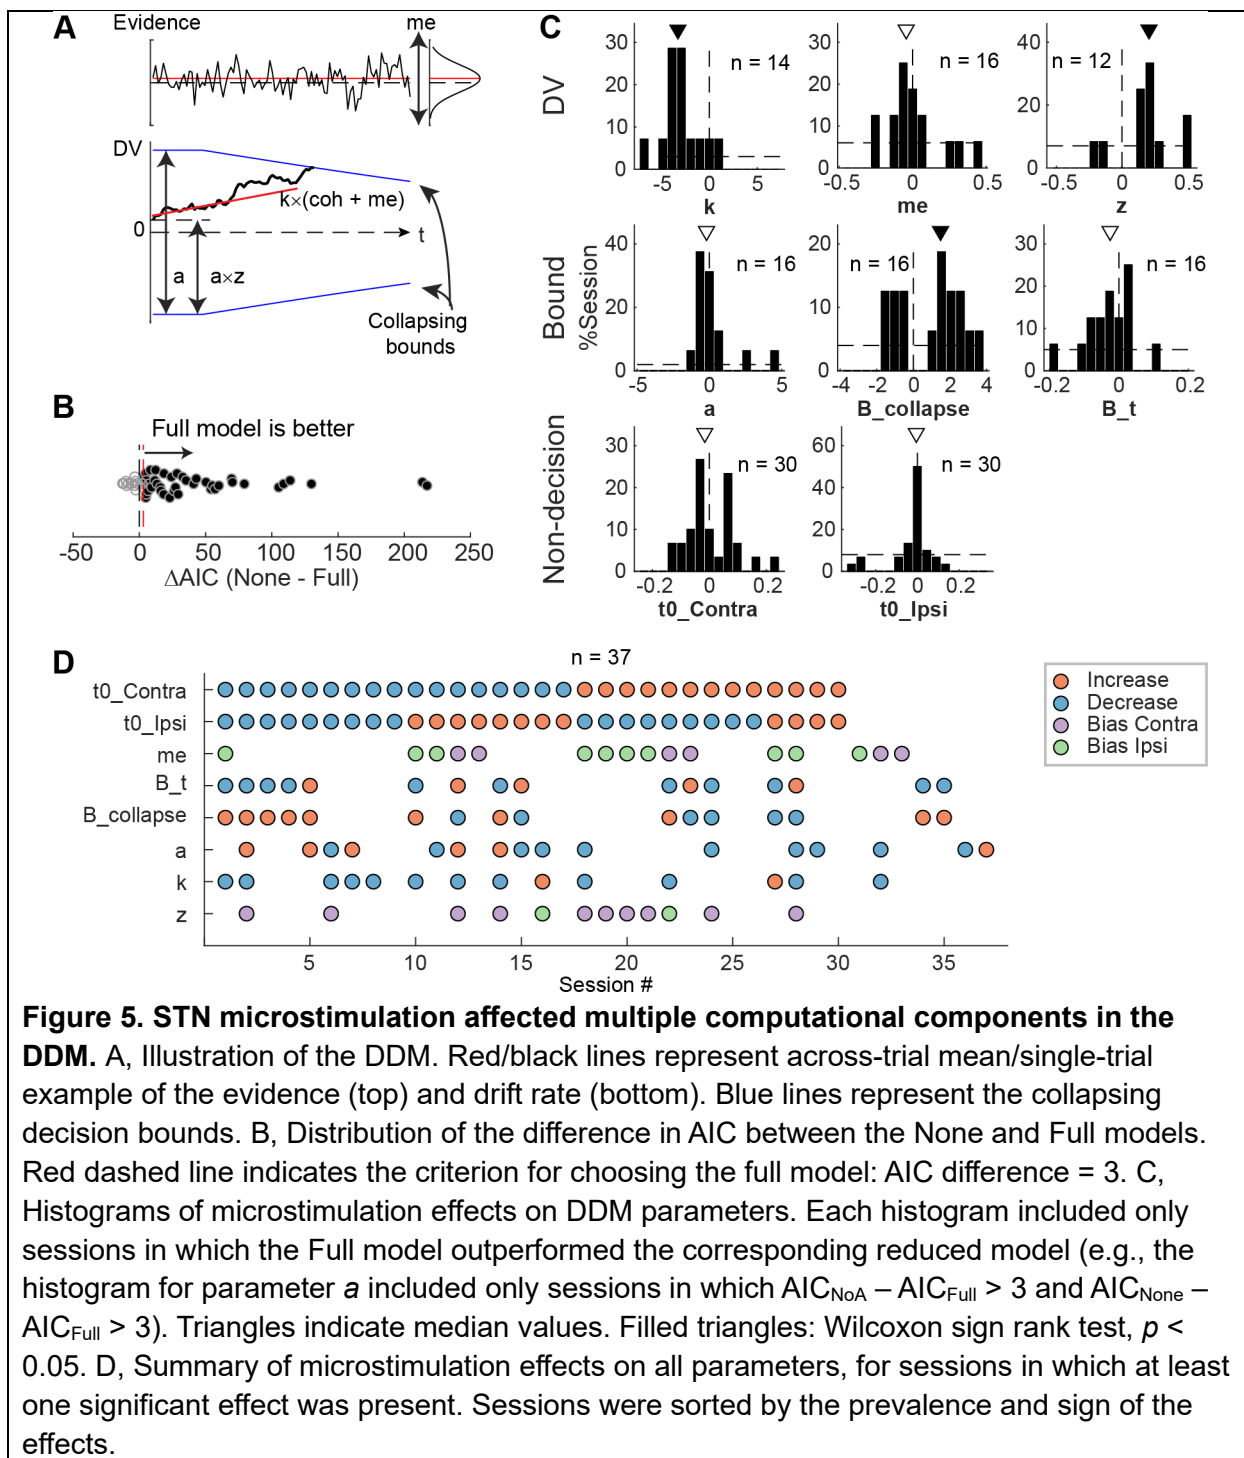

218 To test whether these predictions, and/or other effects, were present in our microstimulation data,  
 219 we fitted a DDM to choice and RT data simultaneously (Figure 5A). We performed AIC-based  
 220 model selection and found that, in 40 of 54 sessions, the Full model, which included  
 221 microstimulation effects on any model parameters, outperformed the None model, which  
 222 assumed that there was no microstimulation effect on any parameters (Figure 5B). This result  
 223 implies that, in these sessions, STN microstimulation affected one or more computational

224 components of the decision process. To better characterize these effects, we compared AICs  
225 between the Full model and six reduced models to identify sessions with reliable  
226 microstimulation-induced changes in particular model parameters (Supplemental Figure 5A).

227 We found that STN microstimulation resulted in reliable changes in several model parameters  
228 over different subsets of sessions (Figure 5C and D). Consistent with model predictions from  
229 Bogacz and Gurney (2007), microstimulation reduced the scale factor for evidence  
230 accumulation,  $k$ , in 14 sessions. This effect contributed to a decreased motion coherence  
231 dependence of choice and RT (Figure 5C, first histogram; Wilcoxon sign-rank test for  $H_0$ : zero  
232 median effect,  $p = 0.021$ ). Consistent with model predictions from Ratcliff and Frank (2012) and  
233 Wei and colleagues (2015), microstimulation affected parameters that controlled the decision  
234 bound ( $a$ ,  $B\_collapse$ ,  $B\_t$ ) in 16 sessions each (not necessarily in the same sessions for each  
235 parameter, see Figure 5D). The changes in the maximal decision bound ( $a$ ) were variable across  
236 sessions ( $p = 0.68$ ). The changes in the collapsing bound dynamics ( $B\_collapse$ ,  $B\_t$ ) tended to  
237 indicate faster and earlier decreases in bounds ( $p = 0.039$  and  $0.088$ , respectively). Consistent  
238 with model predictions from Ratcliff and Frank (2012), microstimulation caused changes in non-  
239 decision times in 30 sessions ( $t0\_Contra$  and  $t0\_Ipsi$ ). These changes varied from session to  
240 session ( $p = 0.28$  and  $0.75$ , respectively). Statistical tests on fitted parameters of all sessions,  
241 regardless of whether a microstimulation effect was necessary to account for the behavioral data,  
242 showed similar trends (Supplemental Figure 5B).

243 STN microstimulation had two additional effects beyond those predicted by the previous  
244 modeling studies. First, consistent with the above-demonstrated microstimulation-induced choice  
245 biases (Figure 4), microstimulation induced offsets in momentary ( $me$ ;  $n = 16$  sessions;  $p = 0.61$ )  
246 and accumulated ( $z$ ;  $n = 12$  sessions;  $p = 0.016$ ) evidence. Second, the microstimulation effects  
247 involved changes in more than one model parameter in the majority of sessions (Figure 5D). We  
248 did not observe any dominant combinations of effects. These results suggest that the STN is  
249 causally involved in multiple decision-related functions, including those mediating the  
250 dependence on evidence, choice biases, and bound dynamics.

251

### 252 **Distribution of microstimulation effects reflected intermingled neuron activity patterns**

253 The multi-faceted microstimulation effects, combined with the fact that the kind of  
254 microstimulation we used tends to activate not just one neuron, but rather groups of neurons near  
255 the tip of the electrode (Tehovnik, 1996), suggested that STN neurons with different functional  
256 roles are located close to one another. Consistent with this idea, neurons that were classified as  
257 belonging to different clusters tended to be intermingled (Figure 6). We did not observe any  
258 consistent topographical organization patterns within or between the two monkeys. At certain  
259 locations, neurons belonging to different clusters were recorded using the same electrode. We  
260 calculated silhouette scores to quantify whether different the activity pattern-based neuron  
261 clusters also formed clusters in the 3D physical space. The mean values were  $-0.09$  and  $-0.11$  for  
262 the two monkeys, respectively, indicating that neurons were often closer to others from a  
263 different cluster than those within the same cluster. In other words, STN subpopulations did not

264 segregate from each other and instead tended to be intermingled, and thus microstimulation  
265 likely activated multiple neurons with different functional properties.

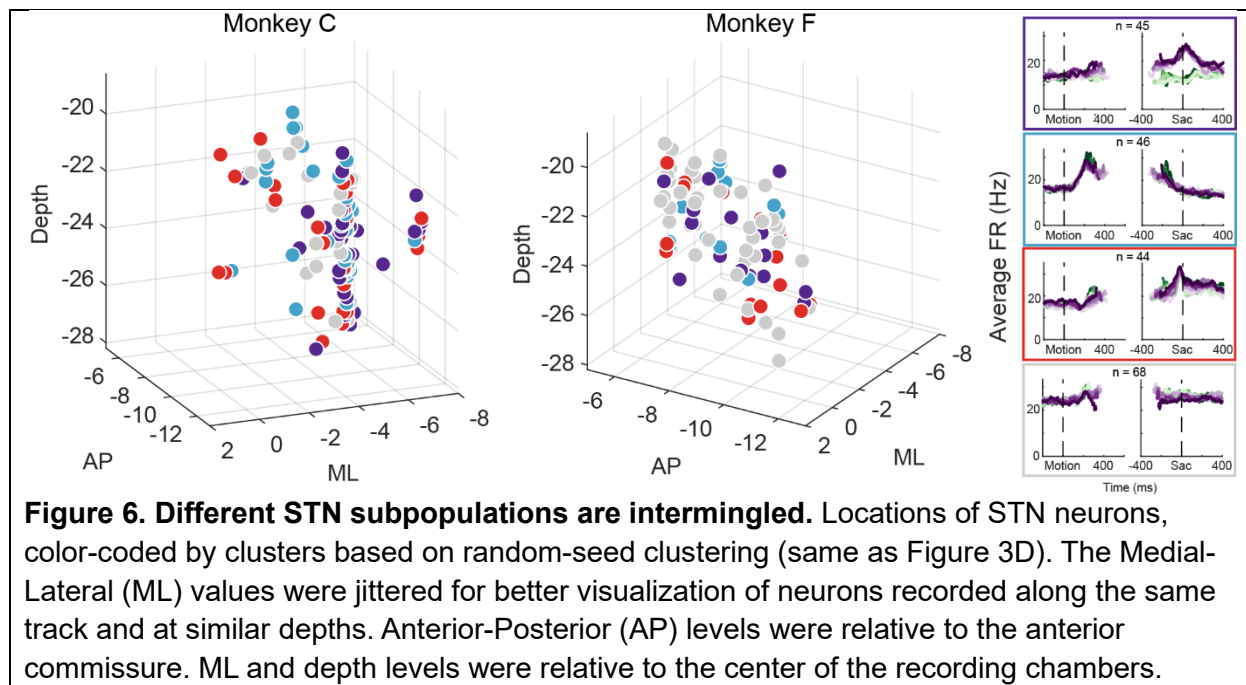

266 Although the intermingled organization of STN subpopulations, defined based on their task-  
267 related activity patterns (Figure 3), made it challenging to relate a specific microstimulation  
268 effect to a specific subpopulation, we did observe certain trends that could contribute to the site-  
269 specific microstimulation effects. We assigned the single or multi-unit activity at the stimulation  
270 sites according to the clusters identified using the random-seeded clustering (Figure 7A). We  
271 then grouped the sites by neuron clusters (Figure 7C). When neurons of different clusters were  
272 recorded at the same site, the same microstimulation effects were assigned to each cluster. We  
273 found that the second cluster was associated with lower overall likelihood of observing  
274 microstimulation effects compared to other clusters (Figure 7B; Chi-square test,  $H_0$ : the  
275 likelihood is the same for the first cluster and the other clusters;  $p = 0.003$ ), while the third  
276 cluster had higher overall likelihood ( $p = 0.035$ ). For the first three clusters, no microstimulation  
277 effect dominated ( $p > 0.3$  for all), whereas it was more likely to observe effects on non-decision  
278 times for the fourth cluster (i.e., with neural activity patterns not related to the three models;  $p =$   
279  $0.001$ ).

280 The sign of microstimulation effects depended weakly on neuron clusters. For example, it was  
281 more likely to observe an increase in maximal bound height (“ $a$ ”) for the third neuron cluster  
282 (Chi-square test,  $H_0$ : same fractions of increase/decrease for all clusters;  $p = 0.073$ ; Chi-square  
283 test,  $H_0$ : equal fractions of increase/decrease within the cluster;  $p = 0.036$ ). Microstimulation  
284 decreased the scale factor (“ $k$ ”) for the third and fourth clusters but caused variable changes for  
285 the first cluster ( $p = 0.070$  and  $0.021$ , respectively). Microstimulation effects on the non-decision  
286 time for the contralateral choices were dominated by increases for the fourth cluster ( $p = 0.04$   
287 and  $0.007$ , respectively). Together, these results suggested that microstimulation effects reflected

288 multiple contributions of intermingled STN subpopulations to decision- and non-decision-related  
 289 processes.

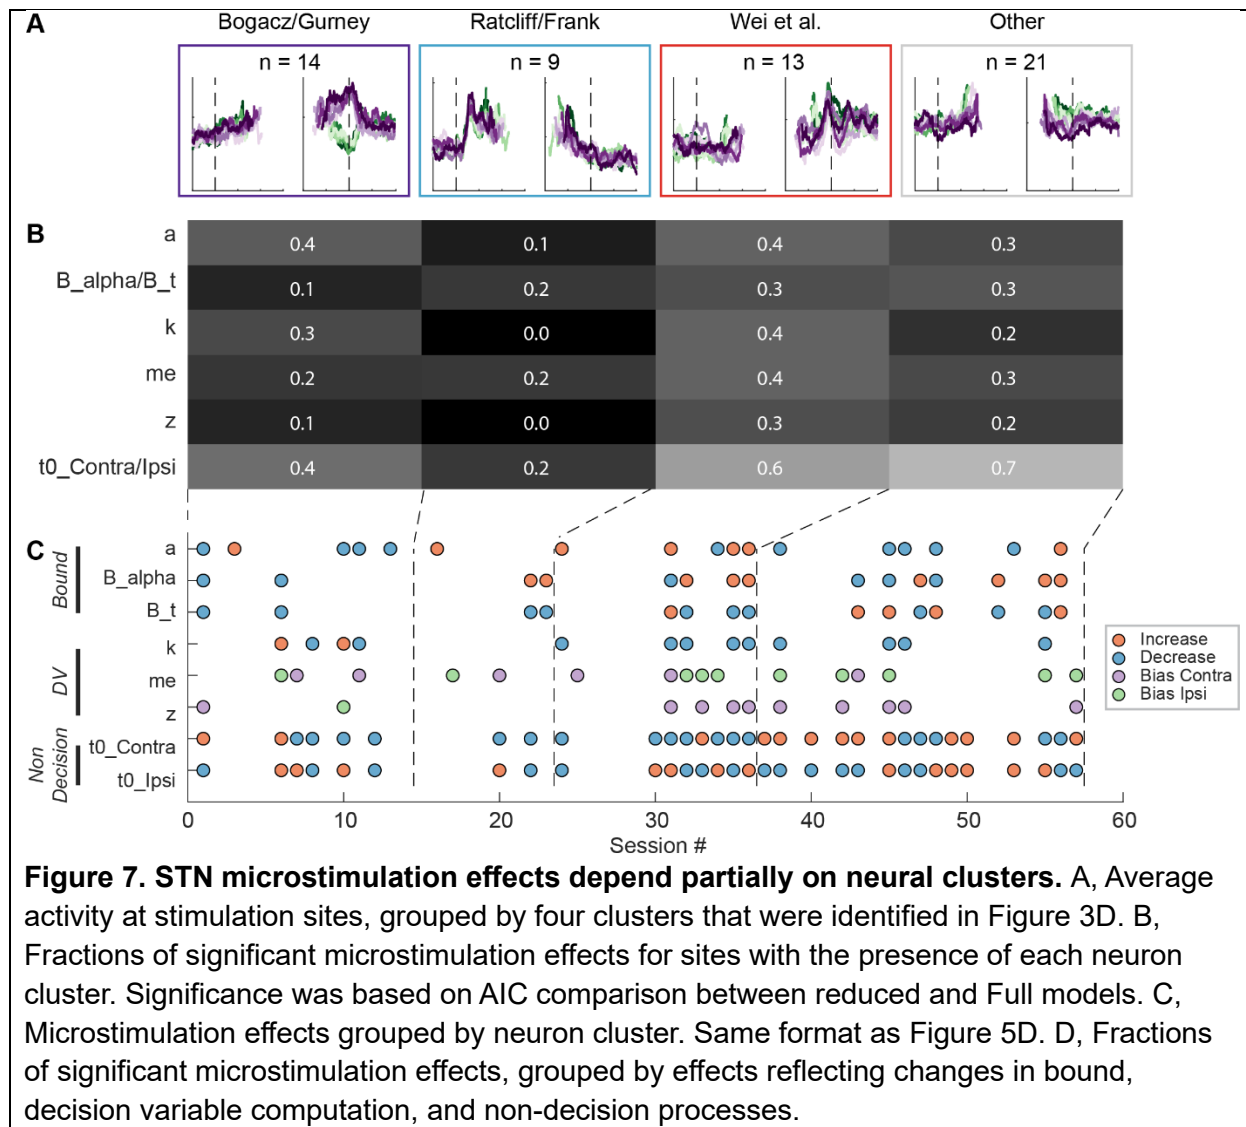

**Figure 7. STN microstimulation effects depend partially on neural clusters.** A, Average activity at stimulation sites, grouped by four clusters that were identified in Figure 3D. B, Fractions of significant microstimulation effects for sites with the presence of each neuron cluster. Significance was based on AIC comparison between reduced and Full models. C, Microstimulation effects grouped by neuron cluster. Same format as Figure 5D. D, Fractions of significant microstimulation effects, grouped by effects reflecting changes in bound, decision variable computation, and non-decision processes.

290

## 291 Discussion

292 We provide the first characterization of single-unit recordings and electrical microstimulation in  
 293 the STN of monkeys performing a demanding perceptual-decision task. We show that: 1) STN  
 294 neurons are heterogeneous in their response profiles; 2) different STN subpopulations, with  
 295 distinct decision-related activity modulation patterns and intermingled within the region, can  
 296 support previously-theorized functions; and 3) electrical microstimulation in STN causes  
 297 changes in choice and RT behaviors, reflecting effects on multiple computational components of  
 298 an accumulate-to-bound decision process. These results indicate that the STN plays important  
 299 and complex roles in perceptual decision formation, both supporting and extending existing  
 300 views of STN function.

301 Our study was motivated by the differing predictions of STN activity patterns from several  
302 theoretical studies that were based on STN cellular physiology, connectivity, and/or response  
303 patterns in non-perceptual decision-making contexts (Bogacz and Gurney, 2007; Ratcliff and  
304 Frank, 2012; Wei et al., 2015). Remarkably, we found three clusters of STN activity that are  
305 consistent with each of these predictions. The three clusters were robust and stable, emerging  
306 when we used two different clustering methods (one with model-based seeds, the other with  
307 random seeds). Interestingly, Zavala and colleagues (2017) have reported two types of STN  
308 responses in human patients performing a flanker task. The “early” response they identified may  
309 correspond to our second cluster, while the “late” response may reflect a combination of our first  
310 and third clusters. Together these results suggest that the primate STN contains distinct  
311 subpopulations with different functional roles. Combined with the microstimulation results, the  
312 presence of these subpopulations suggests that the STN can both contribute to the conversion of  
313 sensory evidence into an appropriately formatted/calibrated decision variable and modulate the  
314 dynamics of decision bound. Future studies of BG function should strive to better understand  
315 how these subpopulations interact with each other, as well as with other neurons in the BG and  
316 larger decision network to support decision making.

317 Despite the general agreements between our observations and previous theoretical predictions,  
318 there were also differences that could be informative for developing future BG models. Most  
319 notably, the models focused on the period of evidence accumulation and less on neural activity  
320 patterns at or after decision commitment. In contrast, our data show interesting modulations  
321 around saccade onset (see Figure 3) that raise several intriguing possibilities for STN’s  
322 contributions to the decision process. In particular, one subpopulation showed a broad peak with  
323 strong choice modulation and little coherence modulation. These modulations may reflect bound-  
324 crossing in an accumulate-to-bound process (but see below). A second subpopulation returned to  
325 the baseline level independent of choice or coherence. The relatively constant trajectory of this  
326 modulation may reflect a collapsing bound or urgency signal that is dependent only on elapsed  
327 time and not the sensory evidence. A third subpopulation maintained coherence-dependent  
328 activity until very close to saccade onset and showed a sharp peak with little choice or coherence  
329 modulation. This sharp peak may signal the end of decision deliberation, without specifying  
330 which decision is made, to direct the network to a post-decision state for decision evaluation.

331 The diverse activity patterns and their intermingled distribution in the STN underscore the  
332 challenge of identifying specific, causal contributions of a particular neural subpopulation. In  
333 many sessions, we observed effects that have been predicted theoretically and observed  
334 experimentally in human PD patients undergoing DBS. These effects included a reduction in RT,  
335 a weaker dependence on evidence, and changes in the maximal value and trajectories of the  
336 decision bound (Frank et al., 2007; Cavanagh et al., 2011; Coulthard et al., 2012; Green et al.,  
337 2013; Zavala et al., 2014; Herz et al., 2016; Pote et al., 2016). In addition to these predicted  
338 effects, microstimulation also changed choice biases, measured as horizontal shifts of  
339 psychometric functions and as two different types of biases in the DDM framework. This  
340 departure from previous DBS studies may arise from different task designs (button press versus  
341 eye movement), health status of the subjects, and experience level (minimally versus extensively  
342 trained). The lateralized bias suggests that the STN may be involved in flexible decision

343 processes that adapt to environments with asymmetric prior probability and/or reward outcomes  
344 for different alternatives, in addition to modulating speed-accuracy tradeoff. Consistent with this  
345 idea, DBS can affect the threshold for deliberations over uncertain sensory inputs or motivational  
346 factors such as reward and effort (Pagnier et al., 2024), suggesting that the STN may be part of a  
347 general selection machinery that can incorporate sensory evidence with information about the  
348 task environment (Redgrave et al., 1999).

349 Our findings also suggest that STN's role in decision formation differs in important ways from  
350 other oculomotor regions that have been examined under similar conditions. First, in the frontal  
351 eye field (FEF), lateral intraparietal area (LIP), and superior colliculus (SC), decision-related  
352 neural activity is dominated by a choice- and coherence-dependent "ramp-to-bound" pattern  
353 (Roitman and Shadlen, 2002; Ding and Gold, 2012a; Crapse et al., 2018; Cho et al., 2021; Jun et  
354 al., 2021; Stine et al., 2023), with additional multiplexing of decision-irrelevant signals (Meister  
355 et al., 2013). In contrast, different STN subpopulations can carry distinct signals that may all be  
356 relevant to decision formation. Moreover, these signals include patterns not evident in the other  
357 regions, such as a choice- and coherence-independent activation in early motion viewing (blue  
358 cluster in Figure 3B and D), that may signal a unique role for the STN.

359 Second, choice-selective ramping activity has been identified in LIP, FEF, SC, the caudate  
360 nucleus, and now two STN subpopulations (Ding and Gold, 2010; Fan et al., 2020). However,  
361 such activity differs among these oculomotor regions just before saccade onset for the preferred  
362 choice. In LIP, FEF, and SC, when the ramping activity is aligned to saccade onset, it shows  
363 negative coherence modulation and positive RT modulation before converging to a common,  
364 higher level, consistent with an accumulate-to-bound process. In the caudate nucleus, the  
365 ramping activity does not converge to a common, higher level. For the first STN subpopulation  
366 (Figure 3), the ramping activity showed on average positive coherence modulation and negative  
367 RT modulation (opposite to predictions of an accumulate-to-bound process) before converging to  
368 a common, higher level. The second STN subpopulation did not show choice-selective activity  
369 before saccade onset. These differences suggest that the caudate and STN neurons participate in  
370 decision deliberation but do not directly mediate decision termination (bound crossing).

371 Third, whereas unilateral perturbations in LIP and SC tend to induce contralateral choice biases  
372 (Hanks et al., 2006; Jun et al., 2021; Jeurissen et al., 2022; Stine et al., 2023), unilateral STN  
373 (and caudate) microstimulation can induce both contralateral and ipsilateral choice biases,  
374 depending on the stimulation site (Ding and Gold, 2012b; Doi et al., 2020). At many sites, STN  
375 microstimulation effects on RT were often bilateral and of the same polarity. Moreover, STN  
376 microstimulation seems to have a particularly strong effect on the overall dependence of choice  
377 and RT on evidence, which was not the case for other oculomotor regions. These differences  
378 suggest that the STN has unique roles in choice-independent computations, likely including  
379 those involving evidence pooled for all alternatives or general bound dynamics (Bogacz and  
380 Gurney, 2007; Ratcliff and Frank, 2012).

381 In summary, we characterized single-neuron activity and the effects of local perturbations in the  
382 STN of monkeys performing a deliberative visual-oculomotor decision task. Our results  
383 validated key aspects of previous theoretical predictions, including specific roles for the STN in



384 modulating decision deliberation and commitment. Our results also identified other features of  
385 decision-related processing in STN that differ from both theoretical predictions and known  
386 properties of other brain areas that contribute to these kinds of decisions. These differences can  
387 help guide future investigations that aim to delineate how cortical-subcortical interactions in  
388 general, and interactions involving the STN in particular, support decision-making and other  
389 aspects of higher brain function.

390

## 391 **Methods**

392 For this study, we used two adult male rhesus monkeys (*Macaca mulatta*) that have been  
393 extensively trained on the direction-discrimination (dots) task. All training, surgery, and  
394 experimental procedures were in accordance with the National Institutes of Health Guide for the  
395 Care and Use of Laboratory Animals and were approved by the University of Pennsylvania  
396 Institutional Animal Care and Use Committee (protocol # 804726).

### 397 Task design and electrophysiology

398 The behavioral task (Figure 1A), general surgical procedure, and data acquisition methods have  
399 been described in detail previously (Ding and Gold, 2010, 2012b). Briefly, the monkey was  
400 required to report the perceived motion direction of the random-dot stimulus with a saccade at a  
401 self-determined time. Trials with different motion coherences (drawn from five levels) and  
402 directions were interleaved randomly. The monkey's eye position was monitored with a video-  
403 based eye tracker and provided reward/error feedback online based on comparisons between the  
404 monkey's eye position and task-relevant locations. Saccade reaction time (RT) was measured  
405 offline with established velocity and acceleration criteria. Neural activity was recorded using  
406 glass-coated tungsten electrodes (Alpha-Omega) or polyamide-coated tungsten electrodes (FHC,  
407 Inc.), using a grid system through a recording chamber with access to the STN. For  
408 microstimulation sessions, lower-impedance FHC electrodes were used to record and stimulate at  
409 the same sites. Single units were identified by offline spike sorting (Offline Sorter, Plexon, Inc.).  
410 Electrical microstimulation was delivered using Grass S88 stimulator as a train of negative-  
411 leading bipolar current pulses (250  $\mu$ s pulse duration, 200 Hz) from motion onset to saccade  
412 onset. For most sessions, a current intensity of 50  $\mu$ A was used. In other sessions, we lowered the  
413 intensity to ensure that microstimulation did not abolish the monkey's ability to complete the  
414 trials. We randomly interleaved trials with and without microstimulation at a 1:1 ratio.

### 415 Localizing the STN

416 We obtained structural MRI scans using T1- MPRAGE and/or T2-SPACE sequences. We  
417 estimated the likely chamber coordinates with access to the STN from these images (and 3D  
418 reconstruction using BrainSight from Rogue Research, Inc) and mapped the surrounding areas  
419 electrophysiologically. Specifically, we identified several putative landmark regions, including 1)  
420 thalamus, which showed characteristic bursts of activity in a low-firing background while the  
421 monkey dozed off; 2) reticular nucleus of the thalamus, where neurons exhibited high baseline  
422 firing rates (with bursts sometimes > 100Hz); 3) zona incerta, where neurons exhibited low, tonic

423 baseline firing and briefly paused their activity around saccades (Ma, 1996); 4) substantia nigra,  
424 pars reticulata, where some neurons showed high baseline firing rates and suppression in activity  
425 around visual stimulus or saccade onset (Hikosaka and Wurtz, 1983); and 5) substantia nigra,  
426 pars compacta, where neurons showed low baseline firing and responded to unexpected reward.  
427 Based on a macaque brain atlas (Saleem and Logothetis, 2007) and previously reported STN  
428 activity patterns (Matsumura et al., 1992; Wichmann et al., 1994b; Isoda and Hikosaka, 2008),  
429 we defined STN as the area that: 1) was surrounded by these landmark regions, 2) was separated  
430 from them by gaps with minimal activity (white matter), and 3) exhibited irregular firing patterns  
431 with occasional short bursts. The baseline firing rate, measured within 50 ms before fixation  
432 point onset, had a mean±SD magnitude of 15.4±12.4 spikes/s in our sample.

### 433 Neural-activity analysis

434 We measured the firing rates for each neuron and trial condition in running windows (300 ms)  
435 aligned to motion and saccade onsets. To visualize the overall activation/suppression, we  
436 averaged the firing rates across trial conditions and computed the z-scores using a 300 ms  
437 window before motion onset as the baseline. To visualize the overall choice preferences, we  
438 averaged the firing rates for each choice, computed the difference between choices, and z-scored  
439 the difference using the same baseline window. To quantitatively measure each neuron's  
440 sensitivity to choice and motion coherence, we performed two multiple linear regressions for  
441 each running window:

$$442 \text{ Spike count} = \beta_0 + \beta_{\text{Choice}} \times I_{\text{Choice}} + \beta_{\text{Coh-Contra}} \times I_{\text{Coh-Contra}} + \beta_{\text{Coh-Ipsi}} \times I_{\text{Coh-Ipsi}}$$

443 (Eq. 1)

$$444 \text{ Spike count} = \beta_0 + \beta_{\text{Choice}} \times I_{\text{Choice}} + \beta_{\text{RT-Contra}} \times I_{\text{RT-Contra}} + \beta_{\text{RT-Ipsi}} \times I_{\text{RT-Ipsi}}$$

445 (Eq. 2)

446 where  $I_{\text{Choice}} = \{1 \text{ for contralateral choice, } -1 \text{ for ipsilateral choice}\}$ ,

447  $I_{\text{Coh-Contra}} = \{\text{coherence for contralateral choice, } 0 \text{ for ipsilateral choice}\}$ ,

448  $I_{\text{Coh-Ipsi}} = \{0 \text{ for contralateral choice, coherence for ipsilateral choice}\}$ .

449  $I_{\text{RT-Contra}} = \{\text{RT for contralateral choice, } 0 \text{ for ipsilateral choice}\}$ ,

450  $I_{\text{RT-Ipsi}} = \{0 \text{ for contralateral choice, RT for ipsilateral choice}\}$ .

451

452 Significance of non-zero coefficients was assessed using a *t*-test (criterion:  $p = 0.05$ ).

### 453 Cluster analysis

454 We converted each neuron's activity into a 30-D vector consisting of the average firing rate  
455 within three 200-ms windows for all trial conditions (i.e., 2 choices  $\times$  5 coherence levels). The  
456 windows were selected as early motion viewing (100 – 300 ms after motion onset), late motion  
457 viewing (300 – 500 ms after motion onset), and peri-saccade (100 ms before to after saccade  
458 onset). The choice identity was designated as either “preferred” and “other”, based on the  
459 relative average activity in the peri-saccade window. Note that this designation was used so that  
460 neurons with similar general modulation patterns except for the polarity of their choice

461 selectivity would be grouped together. This designation was not based on any statistical test and  
 462 did not imply that the peri-saccade activity was reliably choice selective. The average firing rate  
 463 for each neuron was then z-scored based on baseline rates measured in a 300 ms window ending  
 464 at motion onset.

465 We explored multiple method variations using k-means clustering and present results from the  
 466 variation with the highest stability. These variations included: 1) whether or not the vectors were  
 467 projected onto 11 principal components that together explained at least 95% of total variance;  
 468 and 2) calculation of vector distance, including squared Euclidean, cosine, and correlation  
 469 metrics. We determined the best settings using: 1) the Rand index (Rand, 1971), which quantifies  
 470 the stability of clusters in repeated clustering; 2) Silhouette scores, which quantifies the quality  
 471 of grouping and separation between clusters; and 3) visual inspection of clustering results in  
 472 terms of both cluster distribution in a t-SNE space and average activity of the clusters. To  
 473 compute the Rand index, we performed 50 runs of clustering, assuming 3-9 clusters, for each  
 474 combination of variations. The Rand index was computed as the fraction of consistent grouping  
 475 between a pair of units between two clustering runs. For two runs of clustering results, Rand  
 476 index =  $\frac{N_{same-same} + N_{different-different}}{N_{all\ pairs}}$ , where  $N_{same-same}$  counts the number of neuron pairs that  
 477 share clusters in both runs,  $N_{different-different}$  counts the number of neuron pairs that do not  
 478 share clusters in either run, and  $N_{all\ pairs}$  counts the total number of neuron pairs. To compute  
 479 the Silhouette scores, we chose the best of 100 repetitions of clustering for each combination of  
 480 variations. For each neuron, Silhouette score =  $\frac{\max(D_{inter-cluster}, D_{intra-cluster})}{D_{inter-cluster} - D_{intra-cluster}}$ , where  
 481  $D_{inter-cluster}$  is the average distance to the neuron's nearest neighboring cluster, and  
 482  $D_{intra-cluster}$  is the average distance to other neurons in the same cluster. A positive score  
 483 implies that, for the given neuron, its activity was more similar to other neurons within the same  
 484 cluster than those in its nearest neighboring cluster. A negative score implies that the neuron's  
 485 activity was more similar to those outside its own cluster.

486 To classify activity recorded at a microstimulation site, we calculated the correlation between its  
 487 30-D vector and the centroids from random-seeded clustering. The centroid with the highest  
 488 correlation value determined the cluster identity of the activity.

#### 489 Microstimulation-effects analysis

490 We analyzed microstimulation effects in several ways. To characterize the effects without  
 491 assumptions about the underlying decision process, we fitted logistic functions to the choice data  
 492 and linear functions to the RT data. We used three variants of the logistic functions that differed  
 493 in their use of lapse rates:

494 No Lapse:  $p(\text{contralateral choice}) = \frac{1}{1 + e^{-(Slope_0 + Slope_{estim}) \times (Coh + Bias_0 + Bias_{estim})}}$  (Eq. 3)

495 Symmetric Lapse:  $p(\text{contralateral choice}) = \lambda_0 + \lambda_{estim} +$   
 496  $\frac{1 - 2 \times (\lambda_0 + \lambda_{estim})}{1 + e^{-(Slope_0 + Slope_{estim}) \times (Coh + Bias_0 + Bias_{estim})}}$  (Eq. 4)

497 Asymmetric Lapse:  $p$  (contralateral choice) =  $\lambda_{Ipsi0} + \lambda_{Ipsi-estim} +$   
498  $\frac{1 - \lambda_{Ipsi0} - \lambda_{Ipsi-estim} - \lambda_{Contra0} - \lambda_{Contra-estim}}{1 + e^{-(Slope_0 + Slope_{estim}) \times (Coh + Bias_0 + Bias_{estim})}}$  (Eq. 5)

499 where Coh is the signed coherence (positive/negative for motion toward the  
500 contralateral/ipsilateral choice). To assess the significance of the “estim” terms, we used  
501 bootstrap methods. Specifically, we generated 200 sets of data by shuffling the microstimulation  
502 status of trials within each session. We fitted these artificial data using the same logistic  
503 functions to estimate null distributions for each parameter and performed a one-tailed test to  
504 determine if the actual fit value exceeded chance (criterion,  $p < 0.05$ ).

505 We fitted linear functions to the RT data, separately for the two choices:

506  $RT = Offset_0 + Offset_{estim} + (Slope_0 + Slope_{estim}) \times Coh_{unsigned}$  (Eq. 6)

507 We assessed significance using  $t$ -tests (criterion,  $p < 0.05$ ).

508 To infer microstimulation effects on decision-related computations, we fitted drift-diffusion  
509 models to choice and RT data simultaneously. We used DDM variants with collapsing bounds  
510 (DDM; Figure 7A), following previously established procedures (Fan et al., 2018; Doi et al.,  
511 2020). Briefly, the DDM assumes that motion evidence is accumulated over time into a decision  
512 variable (DV), which is compared to two collapsing choice bounds. A choice is made when the  
513 DV crosses either bound, such that the time of crossing determines the decision time and the  
514 identity of the bound determines the choice identity. The model has eight basic parameters  
515 (presented here in six groups): 1)  $a$ , the maximal bound height; 2)  $B_{collapse}$  and  $B_t$ , the decay  
516 speed and onset specifying the time course of the bound “collapse”; 3)  $k$ , a scale factor governing  
517 the rate of evidence accumulation; 4)  $me$ , an offset specifying a bias in the rate of evidence  
518 accumulation; 5)  $z$ , an offset specifying a bias in the DV, or equivalently, asymmetric offsets of  
519 equal magnitude for the two choice bounds; and 6)  $t0_{contra}$  and  $t0_{ipsi}$ , non-decision times for  
520 the two choices that capture RT components that do not depend on evidence accumulation (e.g.,  
521 visual latency and motor delay).

522 We used 8 variants of DDM. In the Full model, all eight parameters were allowed to change with  
523 microstimulation. In the None model, all eight parameters did not change with microstimulation.  
524 In six reduced models (NoA, NoCollapse, NoK, NoME, NoZ, NoT), the corresponding group of  
525 parameters (specified above) were fixed while the other parameters were allowed to change with  
526 microstimulation. We fitted each model using the maximum *a posteriori* estimate method and  
527 previously established prior distributions (Wiecki et al., 2013). We performed five runs for each  
528 fit and used the best run (highest likelihood) for analyses here. We used the Akaike Information  
529 Criterion (AIC) for model selection. We considered an AIC difference  $>3$  to indicate that the  
530 smaller-AIC model significantly outperformed the larger-AIC model. For a given sessions, if the  
531 Full model outperformed a reduced model and the None model, we considered that session to  
532 show significant microstimulation effect(s) on the corresponding model parameter(s). For  
533 example, we considered STN microstimulation to induce significant changes in  $k$  if the Full  
534 model outperformed both None and NoK models for a given session.

535 **Acknowledgements**

536 We thank Jean Zweigle for outstanding animal care and training, Lowell Thompson and Kara  
537 McGaughey for comments on the manuscript, and Michael Suplick for machine shop support  
538 (NIH National Eye Institute Core Grant P30 EY001583). This work was supported by NIH  
539 National Eye Institute (R01-EY022411; LD and JIG).

540

541 **Author contributions**

542 Conceptualization, LD and JIG; methodology, KR and LD; investigation, KR and LD;  
543 visualization, LD and JIG; funding acquisition, LD and JIG; project administration, LD;  
544 supervision, LD; writing – original draft, LD; writing – review & editing, KR, JIG, and LD.

545

546 **Declaration of interests**

547 The authors declare no competing financial interests.

548

## 549 **Figure legends**

550 **Figure 1. Behavioral task and model predictions.** A, Behavioral task. The monkey was  
551 required to report the perceived motion direction of the random-dot stimulus by making a  
552 saccade towards the corresponding choice target at a self-determined time. B, Three previous  
553 models predicted different patterns of STN activity.

554 **Figure 2. STN neurons have diverse response profiles.** A, Activity of three STN neurons  
555 (rows) aligned to motion (left) and saccade (right) onsets and grouped by choice  $\times$  motion  
556 coherence (see legend). For motion-onset alignment, activity was truncated at 100 ms before  
557 saccade onset. For saccade-onset alignment, activity was truncated before 200 ms after motion  
558 onset. B, Summary of average activity patterns. Each row represents the activity of a neuron, z-  
559 scored by baseline activity in a 300 ms window before target onset and averaged across all trial  
560 conditions. Rows are grouped by monkey (red and green shown to the right of each panel:  
561 monkeys C and F, respectively) and sorted by the time of peak values relative to motion onset.  
562 Only correct trials were included. C, Heatmaps of linear regression coefficients for choice (top),  
563 coherence for trials with contralateral choices (middle), and coherence for trials with ipsilateral  
564 choices (bottom), for activity aligned to motion (left) and saccade (right) onsets. Regression was  
565 performed in running windows of 300 ms. Regression coefficients that were not significantly  
566 different from zero ( $t$ -test,  $p > 0.05$ ) were set to zero (green) for display purposes. Neurons were  
567 sorted in rows by the time of peak coefficient magnitude. Only correct trials were included. D,  
568 Time courses of the fractions of regression coefficients that were significantly different from zero  
569 ( $t$ -test,  $p < 0.05$ ), for choice (black), coherence for trials with contralateral choices (red), and  
570 coherence for trials with ipsilateral choices (blue). Dashed line indicates chance level. E, Time  
571 courses of the fractions of non-zero regression coefficients for coherence. Separate fractions  
572 were calculated for trials with the preferred (purple) and null (green) choices from choice-  
573 selectivity activity and for all trials from activity that was not choice selective (gray). Only time  
574 points after motion onset with fractions  $> 0.05$  for choice-selective activity were included.  
575 Dashed line indicates chance level.

576 **Figure 3. STN contains distinct subpopulations.** A, Three activity vectors that were  
577 constructed based on theoretical predictions in Figure 1B and used as seeds for  $k$ -means  
578 clustering (see Methods). B, Each panel shows the average activity of neurons in a cluster, same  
579 format as Figure 2A. The numbers indicate the cluster size. C, Visualization of the clusters using  
580 the  $t$ -distributed stochastic neighbor embedding ( $t$ -SNE) dimension-reduction method. D,  
581 Average activity of clusters identified using random-seeded  $k$ -means clustering. Same format as  
582 Figure 3B. E, Visualization of the random-seeded clusters in the same tSNE space.

583 **Figure 4. STN microstimulation affects monkeys' choice and RT.** A-C, Monkey's choice (top)  
584 and RT (bottom) performance for trials with (red) and without (black) microstimulation for three  
585 example sessions (A,B: monkey C; C: monkey F). Lines: DDM fits. D, Distributions of  
586 microstimulation effects on bias and slope terms of the logistic function. Filled bars in  
587 histograms indicate sessions with significant modulation of the specific term (bootstrap method).  
588 Triangles indicate the median values. Filled triangle: Wilcoxon sign-rank test for  $H_0$ : median=0,  
589  $p < 0.05$ . E and F, Summary of microstimulation effects on the offset (E) and slope (F) terms of a

590 linear regression fit to RT data. Two separate linear regressions were performed for the two  
591 choices (Ipsi/Contra, as indicated). Triangles indicate the median values. Filled triangles:  
592 Wilcoxon sign-rank test,  $p < 0.05$ .

593 **Figure 5. STN microstimulation affected multiple computational components in the DDM.**

594 A, Illustration of the DDM. Red/black lines represent across-trial mean/single-trial example of  
595 the evidence (top) and drift rate (bottom). Blue lines represent the collapsing decision bounds. B,  
596 Distribution of the difference in AIC between the None and Full models. Red dashed line  
597 indicates the criterion for choosing the full model: AIC difference = 3. C, Histograms of  
598 microstimulation effects on DDM parameters. Each histogram included only sessions in which  
599 the Full model outperformed the corresponding reduced model (e.g., the histogram for parameter  
600  $a$  included only sessions in which  $AIC_{NoA} - AIC_{Full} > 3$  and  $AIC_{None} - AIC_{Full} > 3$ ). Triangles  
601 indicate median values. Filled triangles: Wilcoxon sign rank test,  $p < 0.05$ . D, Summary of  
602 microstimulation effects on all parameters, for sessions in which at least one significant effect  
603 was present. Sessions were sorted by the prevalence and sign of the effects.

604 **Figure 6. Different STN subpopulations are intermingled.** Locations of STN neurons, color-  
605 coded by clusters based on random-seed clustering (same as Figure 3D). The Medial-Lateral  
606 (ML) values were jittered for better visualization of neurons recorded along the same track and at  
607 similar depths. Anterior-Posterior (AP) levels were relative to the anterior commissure. ML and  
608 depth levels were relative to the center of the recording chambers.

609 **Figure 7. STN microstimulation effects depend partially on neural clusters.** A, Average  
610 activity at stimulation sites, grouped by four clusters based on the clusters in Figure 3D. B,  
611 Fractions of significant microstimulation effects for sites with the presence of each neuron  
612 cluster. Significance was based on AIC comparison between reduced and Full models. C,  
613 Microstimulation effects grouped by neuron cluster. Same format as Figure 5D. D, Fractions of  
614 significant microstimulation effects, grouped by effects reflecting changes in bound, decision  
615 variable computation, and non-decision processes.

616

## 617 **Supplemental Information**

618 **Suppl. Figure 1. STN activity is modulated by choice and RT.** Same format as Figure 2,  
619 except using choice and RT as regressors.

620 **Suppl. Figure 2. Clustering parameters.** A, Silhouette plots for clustering results using  
621 different combinations of settings. Silhouette scores for neurons are grouped by clusters and  
622 sorted. Red lines indicate the mean scores. Yellow shaded box indicates the chosen setting for  
623 results in Figure 3. B, Average Rand indices for different clustering settings. For each setting, the  
624 k-means algorithm was run 50 times, each time picking the best clusters out of 100 repetitions.  
625 Higher Rand index indicates greater cluster stability across different runs. C, Mean silhouette  
626 scores and the number of negative scores as a function of number of clusters, using the firing rate  
627 vectors and correlation distance. Higher mean score and fewer negative scores indicate better  
628 clustering.

629 **Suppl. Figure 3. Clustering results using alternative numbers of clusters, visualized in tSNE**  
630 **space.** Same format as Figure 3E.

631 **Suppl Figure 4. Comparison of different logistic models.** A, The No Lapse model was  
632 associated with the lowest AIC for most sessions. The Symmetric Lapse model was associated  
633 with lower AICs for 12 sessions. The Asymmetric Lapse model was associated with lower AICs  
634 for 8 sessions. B, Histograms of microstimulation effects on bias, slope, and lapse terms in the  
635 Symmetric Lapse model. C, Histograms of microstimulation effects on bias, slope, and two lapse  
636 (for each choice) terms in the Asymmetric Lapse model. Same format as the histograms in Figure  
637 6A.

638 **Suppl Figure 5.** A, Differences in AIC between reduced and Full models. Filled circles indicate  
639 sessions for which  $AIC_{\text{Reduced}} - AIC_{\text{Full}} > 3$  (red line). Note that for three sessions, the Full model  
640 outperformed the None model but not any of the reduced models. B, Histograms of difference in  
641 DDM parameters between trials with and without microstimulation. Filled bars represent  
642 sessions considered to show significant microstimulation effects on the given parameter, based  
643 on AIC comparisons. Triangles indicate median values. Filled triangles: Wilcoxon sign-rank test,  
644  $p < 0.05$ .

645



## 646 **References**

- 647 Aron AR, Behrens TE, Smith S, Frank MJ, Poldrack RA (2007) Triangulating a cognitive control  
648 network using diffusion-weighted magnetic resonance imaging (MRI) and functional  
649 MRI. *J Neurosci Off J Soc Neurosci* 27:3743–3752.
- 650 Aron AR, Poldrack RA (2006) Cortical and subcortical contributions to Stop signal response  
651 inhibition: role of the subthalamic nucleus. *J Neurosci* 26:2424–2433.
- 652 Baunez C, Humby T, Eagle DM, Ryan LJ, Dunnett SB, Robbins TW (2001) Effects of STN  
653 lesions on simple vs choice reaction time tasks in the rat: preserved motor readiness, but  
654 impaired response selection. *Eur J Neurosci* 13:1609–1616.
- 655 Bergman H, Wichmann T, DeLong MR (1990) Reversal of experimental parkinsonism by lesions  
656 of the subthalamic nucleus. *Science* 249:1436–1438.
- 657 Bergman H, Wichmann T, Karmon B, DeLong MR (1994) The primate subthalamic nucleus. II.  
658 Neuronal activity in the MPTP model of parkinsonism. *J Neurophysiol* 72:507–520.
- 659 Bogacz R, Gurney K (2007) The basal ganglia and cortex implement optimal decision making  
660 between alternative actions. *Neural Comput* 19:442–477.
- 661 Brittain J-S, Watkins KE, Joundi RA, Ray NJ, Holland P, Green AL, Aziz TZ, Jenkinson N  
662 (2012) A role for the subthalamic nucleus in response inhibition during conflict. *J*  
663 *Neurosci* 32:13396–13401.
- 664 Carpenter MB, Whittier JR, Mettler FA (1950) Analysis of choreoid hyperkinesia in the Rhesus  
665 monkey; surgical and pharmacological analysis of hyperkinesia resulting from lesions in  
666 the subthalamic nucleus of Luys. *J Comp Neurol* 92:293–331.
- 667 Cavanagh JF, Wiecki TV, Cohen MX, Figueroa CM, Samanta J, Sherman SJ, Frank MJ (2011)  
668 Subthalamic nucleus stimulation reverses mediofrontal influence over decision threshold.  
669 *Nat Neurosci* 14:1462–1467.
- 670 Cho S-H, Crapse T, Grimaldi P, Lau H, Basso MA (2021) Variable Statistical Structure of  
671 Neuronal Spike Trains in Monkey Superior Colliculus. *J Neurosci* 41:3234–3253.
- 672 Coulthard EJ, Bogacz R, Javed S, Mooney LK, Murphy G, Keeley S, Whone AL (2012) Distinct  
673 roles of dopamine and subthalamic nucleus in learning and probabilistic decision making.  
674 *Brain*.
- 675 Crapse TB, Lau H, Basso MA (2018) A Role for the Superior Colliculus in Decision Criteria.  
676 *Neuron* 97:181-194.e6.
- 677 DeLong MR, Wichmann T (2001) Deep brain stimulation for Parkinson’s disease. *Ann Neurol*  
678 49:142–143.

- 679 Desbonnet L, Temel Y, Visser-Vandewalle V, Blokland A, Hornikx V, Steinbusch HWM (2004)  
680 Premature responding following bilateral stimulation of the rat subthalamic nucleus is  
681 amplitude and frequency dependent. *Brain Res* 1008:198–204.
- 682 Ding L, Gold JI (2010) Caudate encodes multiple computations for perceptual decisions. *J*  
683 *Neurosci* 30:15747–15759.
- 684 Ding L, Gold JI (2012a) Neural correlates of perceptual decision making before, during, and  
685 after decision commitment in monkey frontal eye field. *Cereb Cortex* 22:1052–1067.
- 686 Ding L, Gold JI (2012b) Separate, causal roles of the caudate in saccadic choice and execution in  
687 a perceptual decision task. *Neuron* 75:865–874.
- 688 Doi T, Fan Y, Gold JI, Ding L (2020) The caudate nucleus contributes causally to decisions that  
689 balance reward and uncertain visual information. *Elife* 9:e56694.
- 690 Fan Y, Gold JI, Ding L (2018) Ongoing, rational calibration of reward-driven perceptual biases.  
691 *Elife* 7:e36018.
- 692 Fan Y, Gold JI, Ding L (2020) Frontal eye field and caudate neurons make different contributions  
693 to reward-biased perceptual decisions. *eLife* 9:e60535.
- 694 Frank MJ (2006) Hold your horses: a dynamic computational role for the subthalamic nucleus in  
695 decision making. *Neural Netw* 19:1120–1136.
- 696 Frank MJ, Samanta J, Moustafa AA, Sherman SJ (2007) Hold your horses: impulsivity, deep  
697 brain stimulation, and medication in parkinsonism. *Science* 318:1309–1312.
- 698 Fumagalli M, Giannicola G, Rosa M, Marceglia S, Lucchiari C, Mrakic-Spota S, Servello D,  
699 Pacchetti C, Porta M, Sassi M, Zangaglia R, Franzini A, Albanese A, Romito L,  
700 Piacentini S, Zago S, Pravettoni G, Barbieri S, Priori A (2011) Conflict-dependent  
701 dynamic of subthalamic nucleus oscillations during moral decisions. *Soc Neurosci*  
702 6:243–256.
- 703 Gold JI, Shadlen MN (2007) The neural basis of decision making. *Annu Rev Neurosci* 30:535–  
704 574.
- 705 Green N, Bogacz R, Huebl J, Beyer AK, Kuhn AA, Heekeren HR (2013) Reduction of influence  
706 of task difficulty on perceptual decision making by STN deep brain stimulation. *Curr*  
707 *Biol* 23:1681–1684.
- 708 Hanks TD, Ditterich J, Shadlen MN (2006) Microstimulation of macaque area LIP affects  
709 decision-making in a motion discrimination task. *Nat Neurosci* 9:682–689.
- 710 Herz DM, Tan H, Brittain JS, Fischer P, Cheeran B, Green AL, FitzGerald J, Aziz TZ, Ashkan K,  
711 Little S, Foltynie T, Limousin P, Zrinzo L, Bogacz R, Brown P (2017) Distinct  
712 mechanisms mediate speed-accuracy adjustments in cortico-subthalamic networks. *Elife*  
713 6.

- 714 Herz DM, Zavala BA, Bogacz R, Brown P (2016) Neural Correlates of Decision Thresholds in  
715 the Human Subthalamic Nucleus. *Curr Biol* 26:916–920.
- 716 Hikosaka O, Wurtz RH (1983) Visual and oculomotor functions of monkey substantia nigra pars  
717 reticulata. III. Memory-contingent visual and saccade responses. *J Neurophysiol*  
718 49:1268–1284.
- 719 Isoda M, Hikosaka O (2008) Role for subthalamic nucleus neurons in switching from automatic  
720 to controlled eye movement. *J Neurosci* 28:7209–7218.
- 721 Jeurissen D, Shushruth S, El-Shamayleh Y, Horwitz GD, Shadlen MN (2022) Deficits in  
722 decision-making induced by parietal cortex inactivation are compensated at two  
723 timescales. *Neuron* 110:1924-1931.e5.
- 724 Jun E, Bautista A, Nunez M, Allen D, Tak J, Alvarez E, Basso M (2021) Causal role for the  
725 primate superior colliculus in the computation of evidence for perceptual decisions. *Nat*  
726 *Neurosci* 24:1121–1131.
- 727 Lehericy S, Ducros M, Krainik A, Francois C, Van de Moortele PF, Ugurbil K, Kim DS (2004)  
728 3-D diffusion tensor axonal tracking shows distinct SMA and pre-SMA projections to the  
729 human striatum. *Cereb Cortex* 14:1302–1309.
- 730 Lo CC, Wang XJ (2006) Cortico-basal ganglia circuit mechanism for a decision threshold in  
731 reaction time tasks. *Nat Neurosci* 9:956–963.
- 732 Ma TP (1996) Saccade-related omnivectoral pause neurons in the primate zona incerta.  
733 *Neuroreport* 7:2713–2716.
- 734 Martin JP (1927) HEMICHOREA RESULTING FROM A LOCAL LESION OF THE BRAIN.  
735 (THE SYNDROME OF THE BODY OF LUYSS. *Brain* 50:637–649.
- 736 Martin JP, Alcock NS (1934) HEMICHOREA ASSOCIATED WITH A LESION OF THE  
737 CORPUS LUYSSII. *Brain* 57:504–516.
- 738 Matsumura M, Kojima J, Gardiner TW, Hikosaka O (1992) Visual and oculomotor functions of  
739 monkey subthalamic nucleus. *J Neurophysiol* 67:1615–1632.
- 740 Meister ML, Hennig JA, Huk AC (2013) Signal multiplexing and single-neuron computations in  
741 lateral intraparietal area during decision-making. *J Neurosci* 33:2254–2267.
- 742 Pagnier GJ, Asaad WF, Frank MJ (2024) Double dissociation of dopamine and subthalamic  
743 nucleus stimulation on effortful cost/benefit decision making. *Curr Biol* CB 34:655-  
744 660.e3.
- 745 Pasquereau B, Turner RS (2017) A selective role for ventromedial subthalamic nucleus in  
746 inhibitory control. *Elife* 6.

- 747 Pote I, Torkamani M, Kefalopoulou ZM, Zrinzo L, Limousin-Dowsey P, Foltynie T,  
748 Speekenbrink M, Jahanshahi M (2016) Subthalamic nucleus deep brain stimulation  
749 induces impulsive action when patients with Parkinson's disease act under speed  
750 pressure. *Exp Brain Res* 234:1837–1848.
- 751 Rand WM (1971) Objective Criteria for the Evaluation of Clustering Methods. *J Am Stat Assoc*  
752 66:846–850.
- 753 Ratcliff R, Frank MJ (2012) Reinforcement-based decision making in corticostriatal circuits:  
754 mutual constraints by neurocomputational and diffusion models. *Neural Comput*  
755 24:1186–1229.
- 756 Redgrave P, Prescott TJ, Gurney K (1999) The basal ganglia: a vertebrate solution to the  
757 selection problem? *Neuroscience* 89:1009–1023.
- 758 Roitman JD, Shadlen MN (2002) Response of neurons in the lateral intraparietal area during a  
759 combined visual discrimination reaction time task. *J Neurosci* 22:9475–9489.
- 760 Saleem KS, Logothetis N (2007) A combined MRI and histology atlas of the rhesus monkey  
761 brain in stereotaxic coordinates. London ; Burlington, MA: Academic.
- 762 Schmidt R, Leventhal DK, Mallet N, Chen F, Berke JD (2013) Canceling actions involves a race  
763 between basal ganglia pathways. *Nat Neurosci* 16:1118–1124.
- 764 Stine GM, Trautmann EM, Jeurissen D, Shadlen MN (2023) A neural mechanism for terminating  
765 decisions. *Neuron* 111:2601-2613.e5.
- 766 Tehovnik EJ (1996) Electrical stimulation of neural tissue to evoke behavioral responses. *J*  
767 *Neurosci Methods* 65:1–17.
- 768 Wei W, Rubin JE, Wang XJ (2015) Role of the indirect pathway of the basal ganglia in  
769 perceptual decision making. *J Neurosci* 35:4052–4064.
- 770 Whittier JR, Mettler FA (1949) Studies on the subthalamus of the rhesus monkey; hyperkinesia  
771 and other physiologic effects of subthalamic lesions; with special reference to the  
772 subthalamic nucleus of Luys. *J Comp Neurol* 90:319–372.
- 773 Wichmann T, Bergman H, DeLong MR (1994a) The primate subthalamic nucleus. III. Changes  
774 in motor behavior and neuronal activity in the internal pallidum induced by subthalamic  
775 inactivation in the MPTP model of parkinsonism. *J Neurophysiol* 72:521–530.
- 776 Wichmann T, Bergman H, DeLong MR (1994b) The primate subthalamic nucleus. I. Functional  
777 properties in intact animals. *J Neurophysiol* 72:494–506.
- 778 Witt K, Pulkowski U, Herzog J, Lorenz D, Hamel W, Deuschl G, Krack P (2004) Deep brain  
779 stimulation of the subthalamic nucleus improves cognitive flexibility but impairs  
780 response inhibition in Parkinson disease. *Arch Neurol* 61:697–700.

- 781 Zaghoul KA, Weidemann CT, Lega BC, Jaggi JL, Baltuch GH, Kahana MJ (2012) Neuronal  
782 Activity in the Human Subthalamic Nucleus Encodes Decision Conflict during Action  
783 Selection. *J Neurosci* 32:2453–2460.
- 784 Zavala B, Damera S, Dong JW, Lungu C, Brown P, Zaghoul KA (2017) Human Subthalamic  
785 Nucleus Theta and Beta Oscillations Entrain Neuronal Firing During Sensorimotor  
786 Conflict. *Cereb Cortex* 27:496–508.
- 787 Zavala BA, Tan H, Little S, Ashkan K, Hariz M, Foltynie T, Zrinzo L, Zaghoul KA, Brown P  
788 (2014) Midline Frontal Cortex Low-Frequency Activity Drives Subthalamic Nucleus  
789 Oscillations during Conflict. *J Neurosci* 34:7322.
- 790

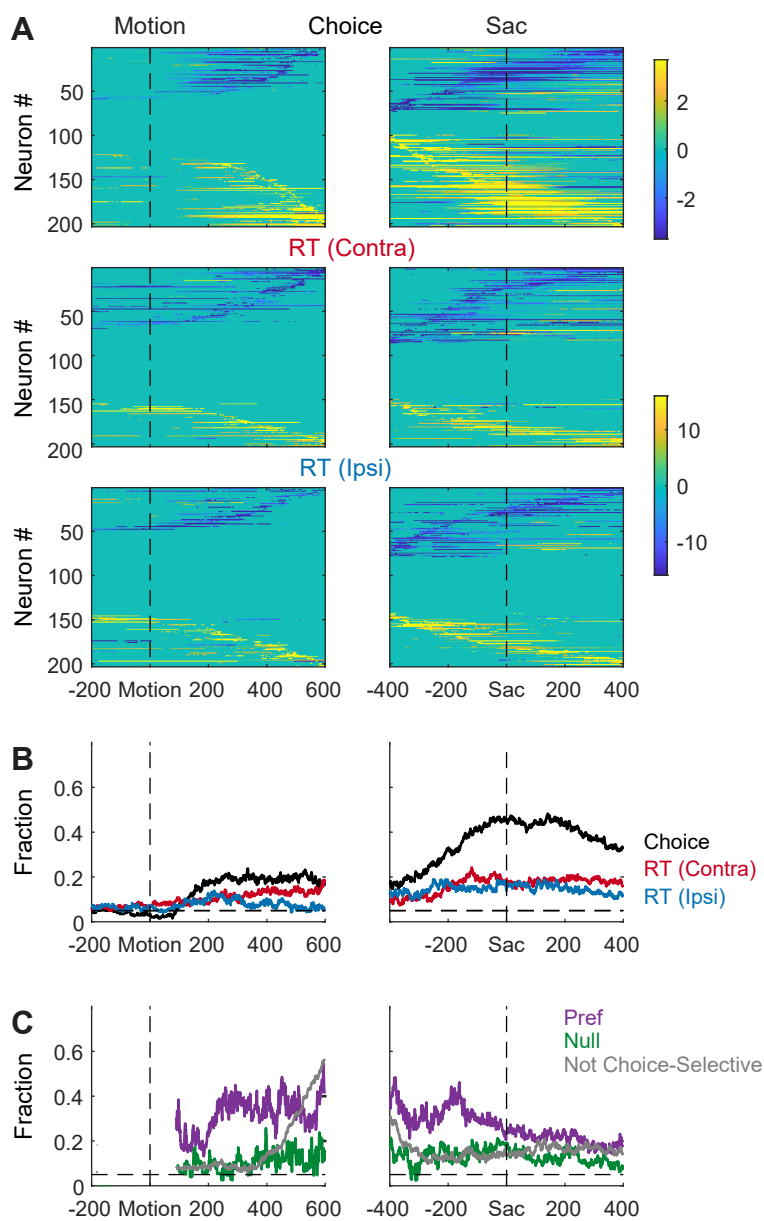

**Suppl. Figure 1. STN activity is modulated by choice and RT. Same format as Figure 2, except using choice and RT as regressors.**

**A**

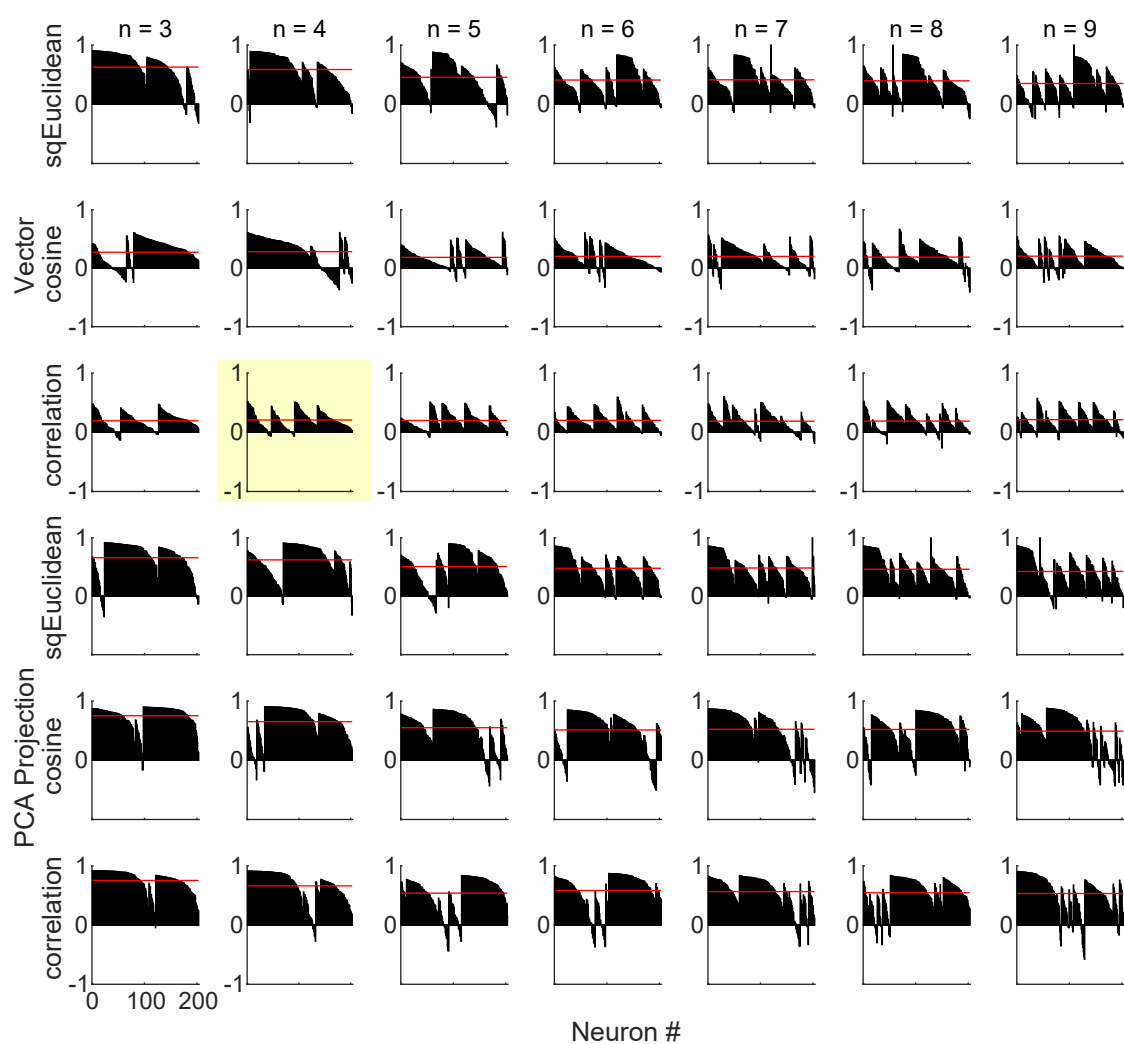

**B**

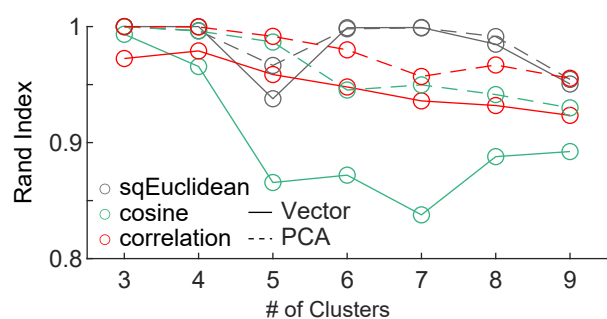

**C**

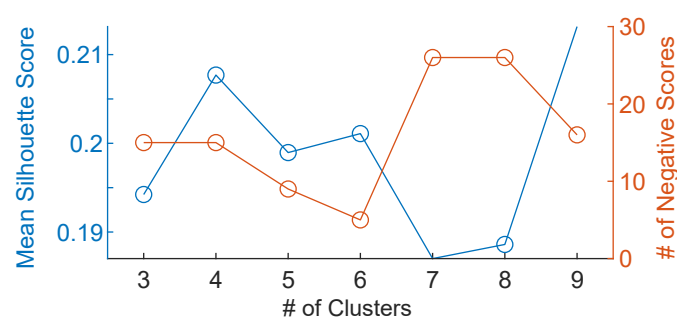

**Suppl. Figure 2. Clustering parameters.** A, Silhouette plots for clustering results using different combinations of settings. Silhouette scores for neurons are grouped by clusters and sorted. Red lines indicate the mean scores. Yellow shaded box indicates the chosen setting for results in Figure 3. B, Average Rand indices for different clustering settings. For each setting, the k-means algorithm was run 50 times, each time picking the best clusters out of 100 repetitions. Higher Rand index indicates greater cluster stability across different runs. C, Mean silhouette scores and the number of negative scores as a function of number of clusters, using the firing rate vectors and correlation distance. Higher mean score and fewer negative scores indicate better clustering.

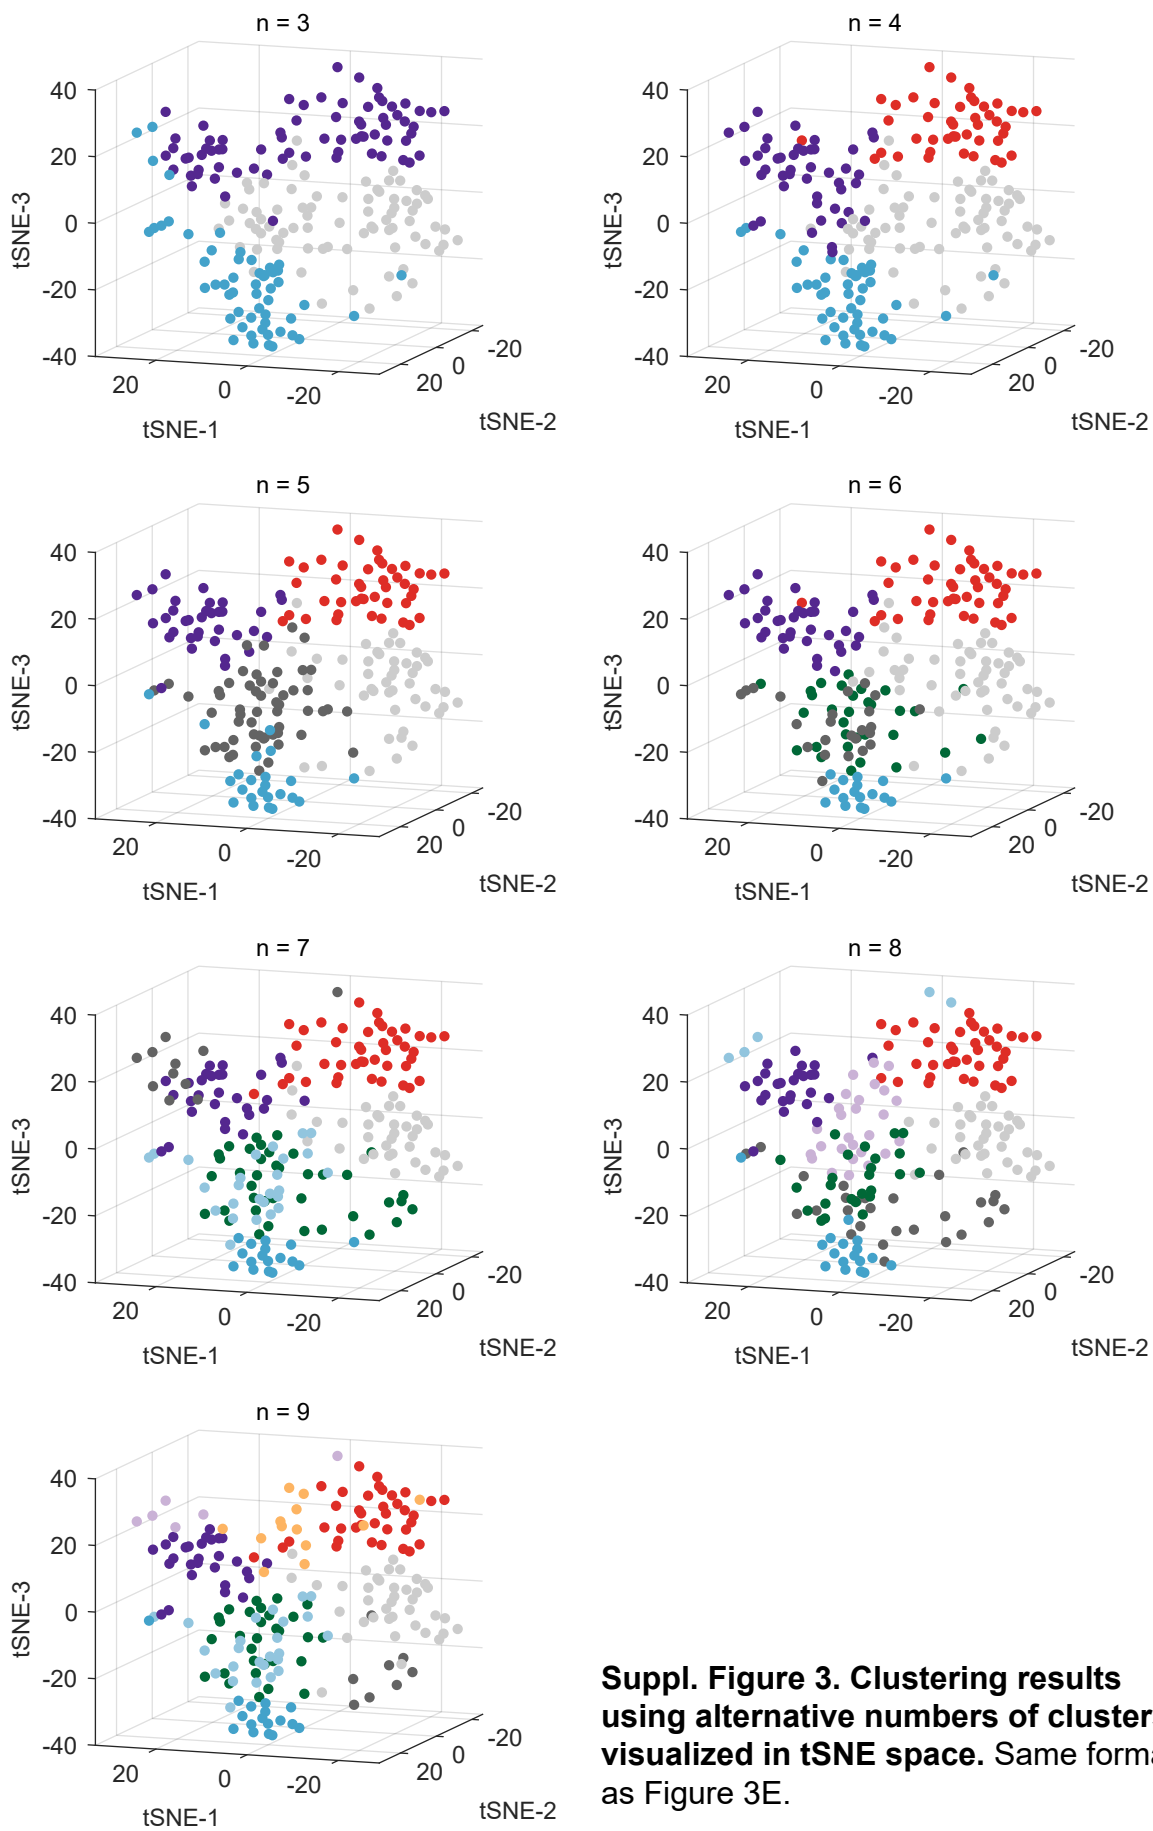

**Suppl. Figure 3. Clustering results using alternative numbers of clusters, visualized in tSNE space. Same format as Figure 3E.**



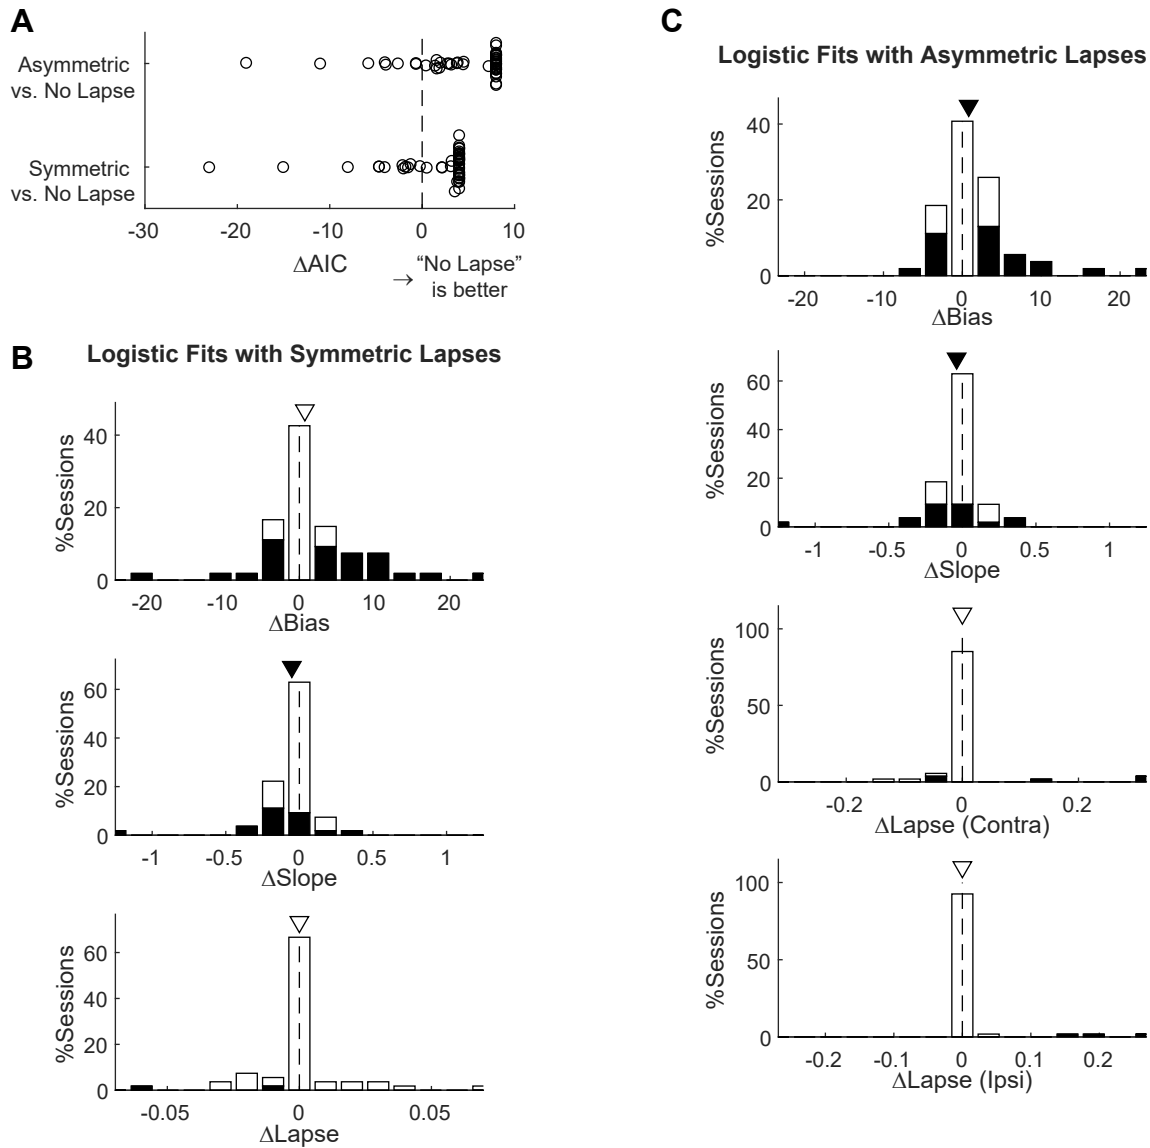

**Suppl Figure 4. Comparison of different logistic models.** A, The No Lapse model was associated with the lowest AIC for most sessions. The Symmetric Lapse model was associated with lower AICs for 12 sessions. The Asymmetric Lapse model was associated with lower AICs for 8 sessions. B, Histograms of microstimulation effects on bias, slope, and lapse terms in the Symmetric Lapse model. C, Histograms of microstimulation effects on bias, slope, and two lapse (for each choice) terms in the Asymmetric Lapse model. Same format as the histograms in Figure 6A.

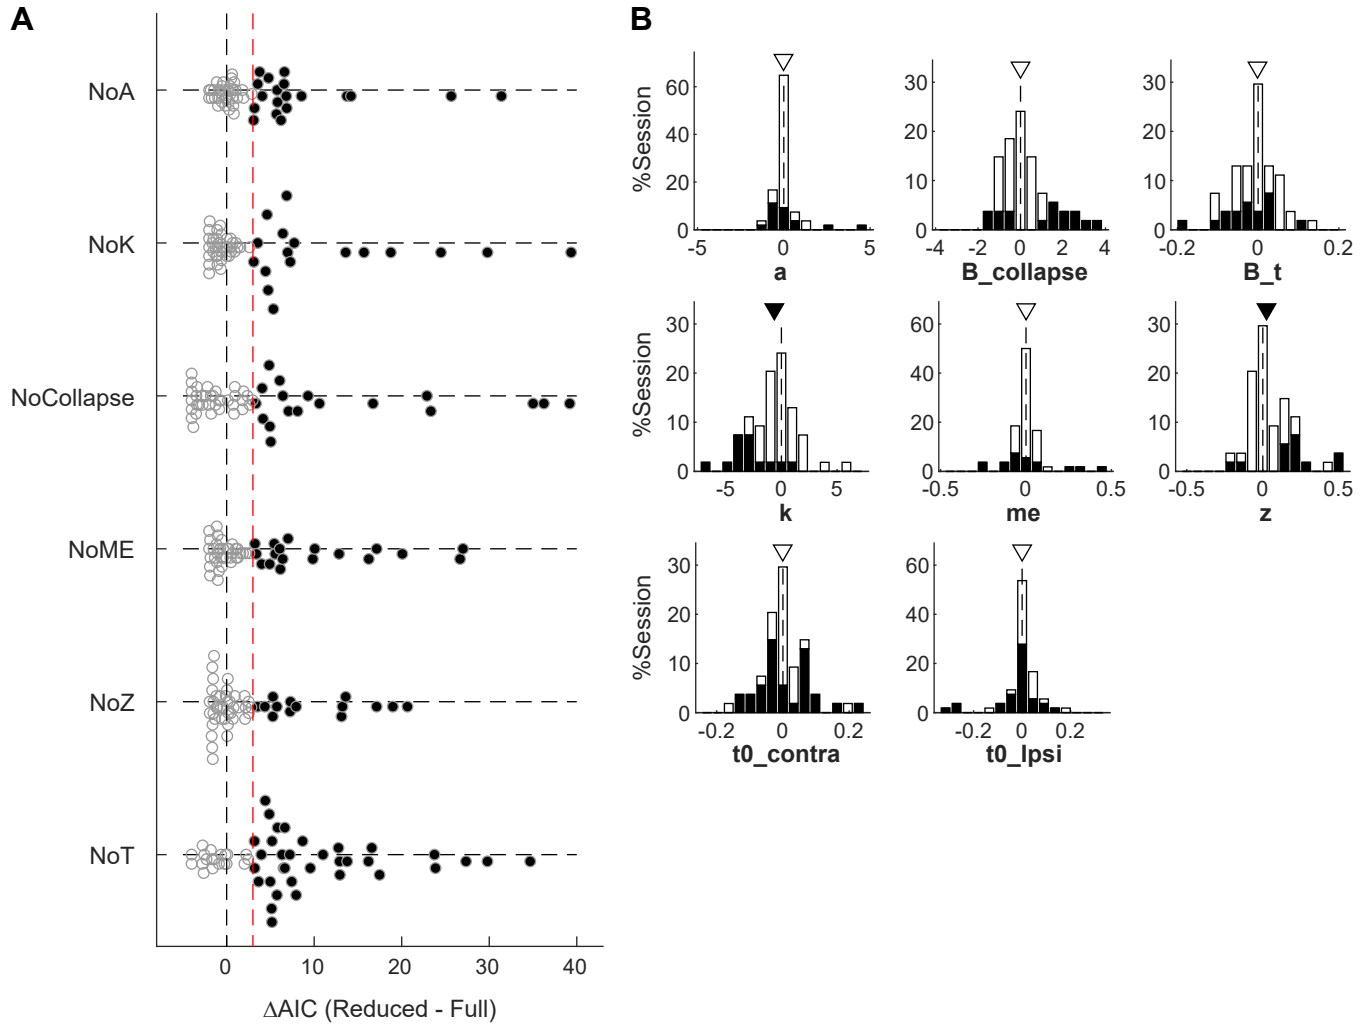

**Suppl Figure 5.** A, Differences in AIC between reduced and Full models. Filled circles indicate sessions for which  $AIC_{\text{Reduced}} - AIC_{\text{Full}} > 3$  (red line). Note that for three sessions, the Full model outperformed the None model but not any of the reduced models. B, Histograms of difference in DDM parameters between trials with and without microstimulation. Filled bars represent sessions considered to show significant microstimulation effects on the given parameter, based on AIC comparisons. Triangles indicate median values. Filled triangles: Wilcoxon sign-rank test,  $p < 0.05$ .
