# Supplementary material for: The subthalamic nucleus contributes causally to perceptual decision-making in monkeys
Source: PubMed Central journal article supplement (PMC11030388; doi:10.1101/2024.04.09.588715), 2024-04-13
Supplement: NIHPP2024.04.09.588715v1-supplement-1.pdf [file NIHPP2024.04.09.588715v1-supplement-1.pdf]

## 617 **Supplemental Information**

618 **Suppl. Figure 1. STN activity is modulated by choice and RT.** Same format as Figure 2,  
619 except using choice and RT as regressors.

620 **Suppl. Figure 2. Clustering parameters.** A, Silhouette plots for clustering results using  
621 different combinations of settings. Silhouette scores for neurons are grouped by clusters and  
622 sorted. Red lines indicate the mean scores. Yellow shaded box indicates the chosen setting for  
623 results in Figure 3. B, Average Rand indices for different clustering settings. For each setting, the  
624 k-means algorithm was run 50 times, each time picking the best clusters out of 100 repetitions.  
625 Higher Rand index indicates greater cluster stability across different runs. C, Mean silhouette  
626 scores and the number of negative scores as a function of number of clusters, using the firing rate  
627 vectors and correlation distance. Higher mean score and fewer negative scores indicate better  
628 clustering.

629 **Suppl. Figure 3. Clustering results using alternative numbers of clusters, visualized in tSNE**  
630 **space.** Same format as Figure 3E.

631 **Suppl Figure 4. Comparison of different logistic models.** A, The No Lapse model was  
632 associated with the lowest AIC for most sessions. The Symmetric Lapse model was associated  
633 with lower AICs for 12 sessions. The Asymmetric Lapse model was associated with lower AICs  
634 for 8 sessions. B, Histograms of microstimulation effects on bias, slope, and lapse terms in the  
635 Symmetric Lapse model. C, Histograms of microstimulation effects on bias, slope, and two lapse  
636 (for each choice) terms in the Asymmetric Lapse model. Same format as the histograms in Figure  
637 6A.

638 **Suppl Figure 5.** A, Differences in AIC between reduced and Full models. Filled circles indicate  
639 sessions for which  $AIC_{\text{Reduced}} - AIC_{\text{Full}} > 3$  (red line). Note that for three sessions, the Full model  
640 outperformed the None model but not any of the reduced models. B, Histograms of difference in  
641 DDM parameters between trials with and without microstimulation. Filled bars represent  
642 sessions considered to show significant microstimulation effects on the given parameter, based  
643 on AIC comparisons. Triangles indicate median values. Filled triangles: Wilcoxon sign-rank test,  
644  $p < 0.05$ .

645

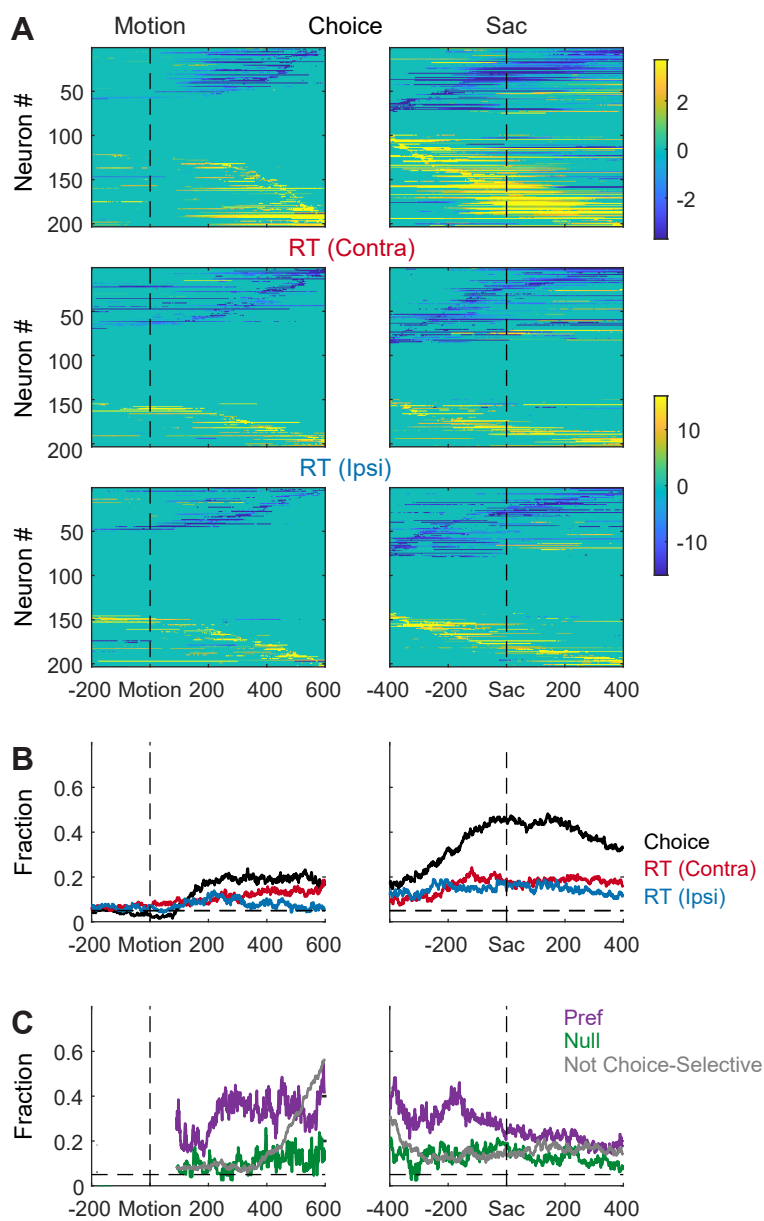

**Suppl. Figure 1. STN activity is modulated by choice and RT. Same format as Figure 2, except using choice and RT as regressors.**

**A**

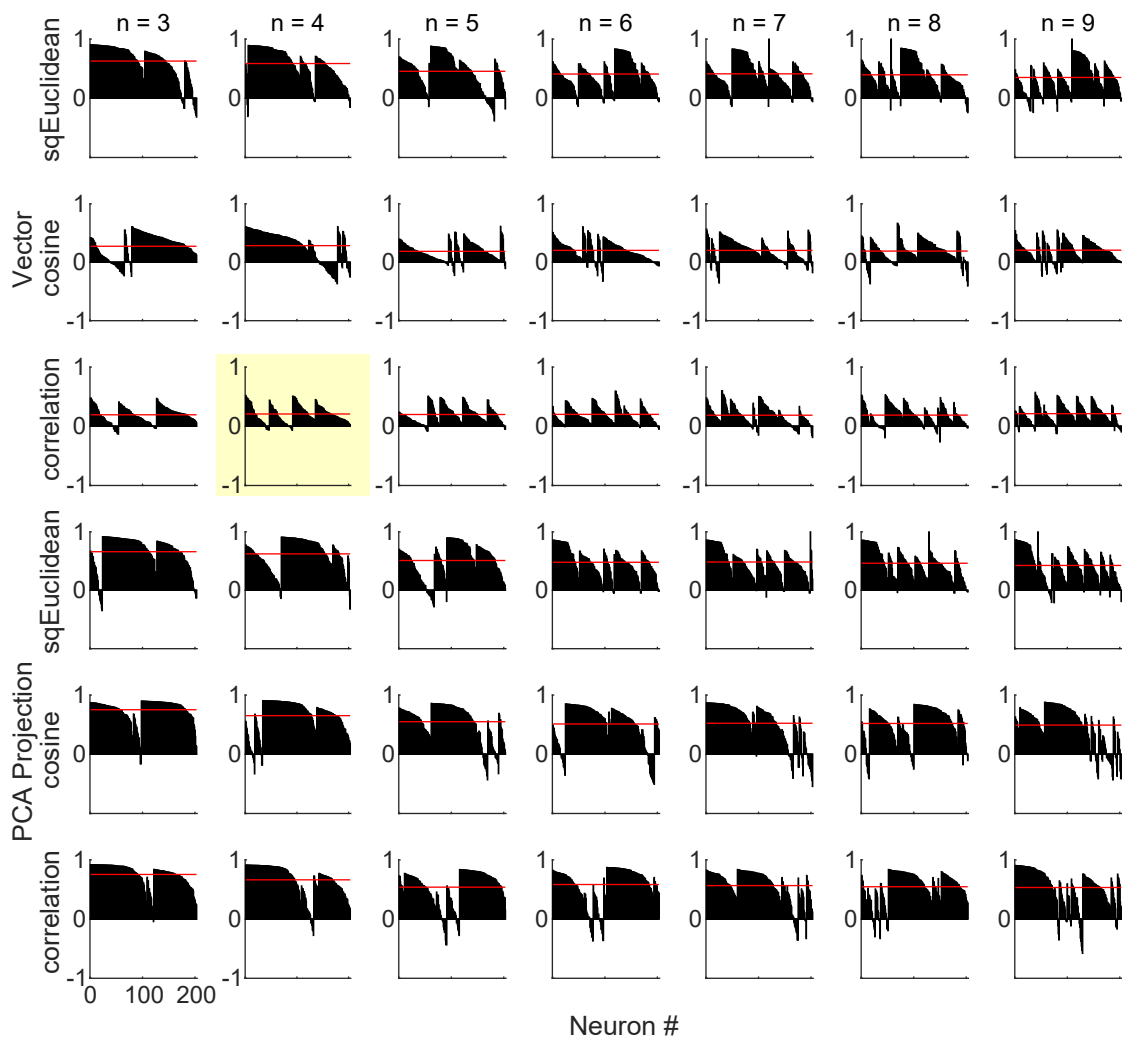

**B**

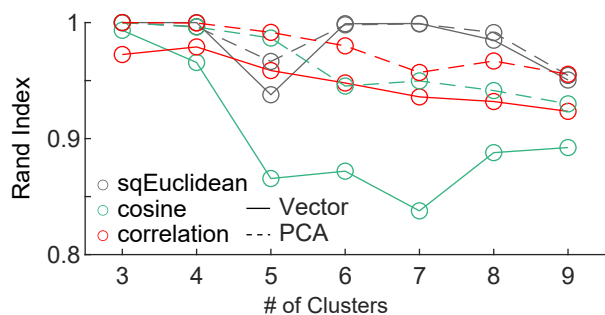

**C**

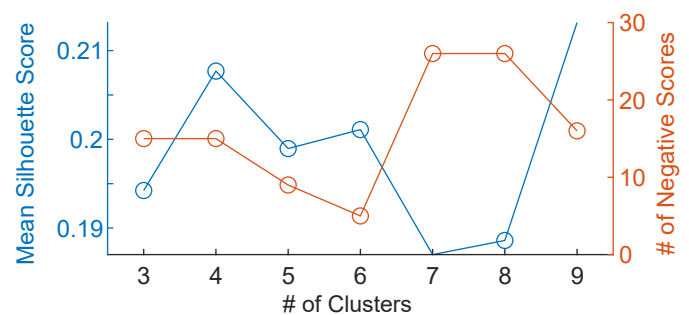

**Suppl. Figure 2. Clustering parameters.** A, Silhouette plots for clustering results using different combinations of settings. Silhouette scores for neurons are grouped by clusters and sorted. Red lines indicate the mean scores. Yellow shaded box indicates the chosen setting for results in Figure 3. B, Average Rand indices for different clustering settings. For each setting, the k-means algorithm was run 50 times, each time picking the best clusters out of 100 repetitions. Higher Rand index indicates greater cluster stability across different runs. C, Mean silhouette scores and the number of negative scores as a function of number of clusters, using the firing rate vectors and correlation distance. Higher mean score and fewer negative scores indicate better clustering.

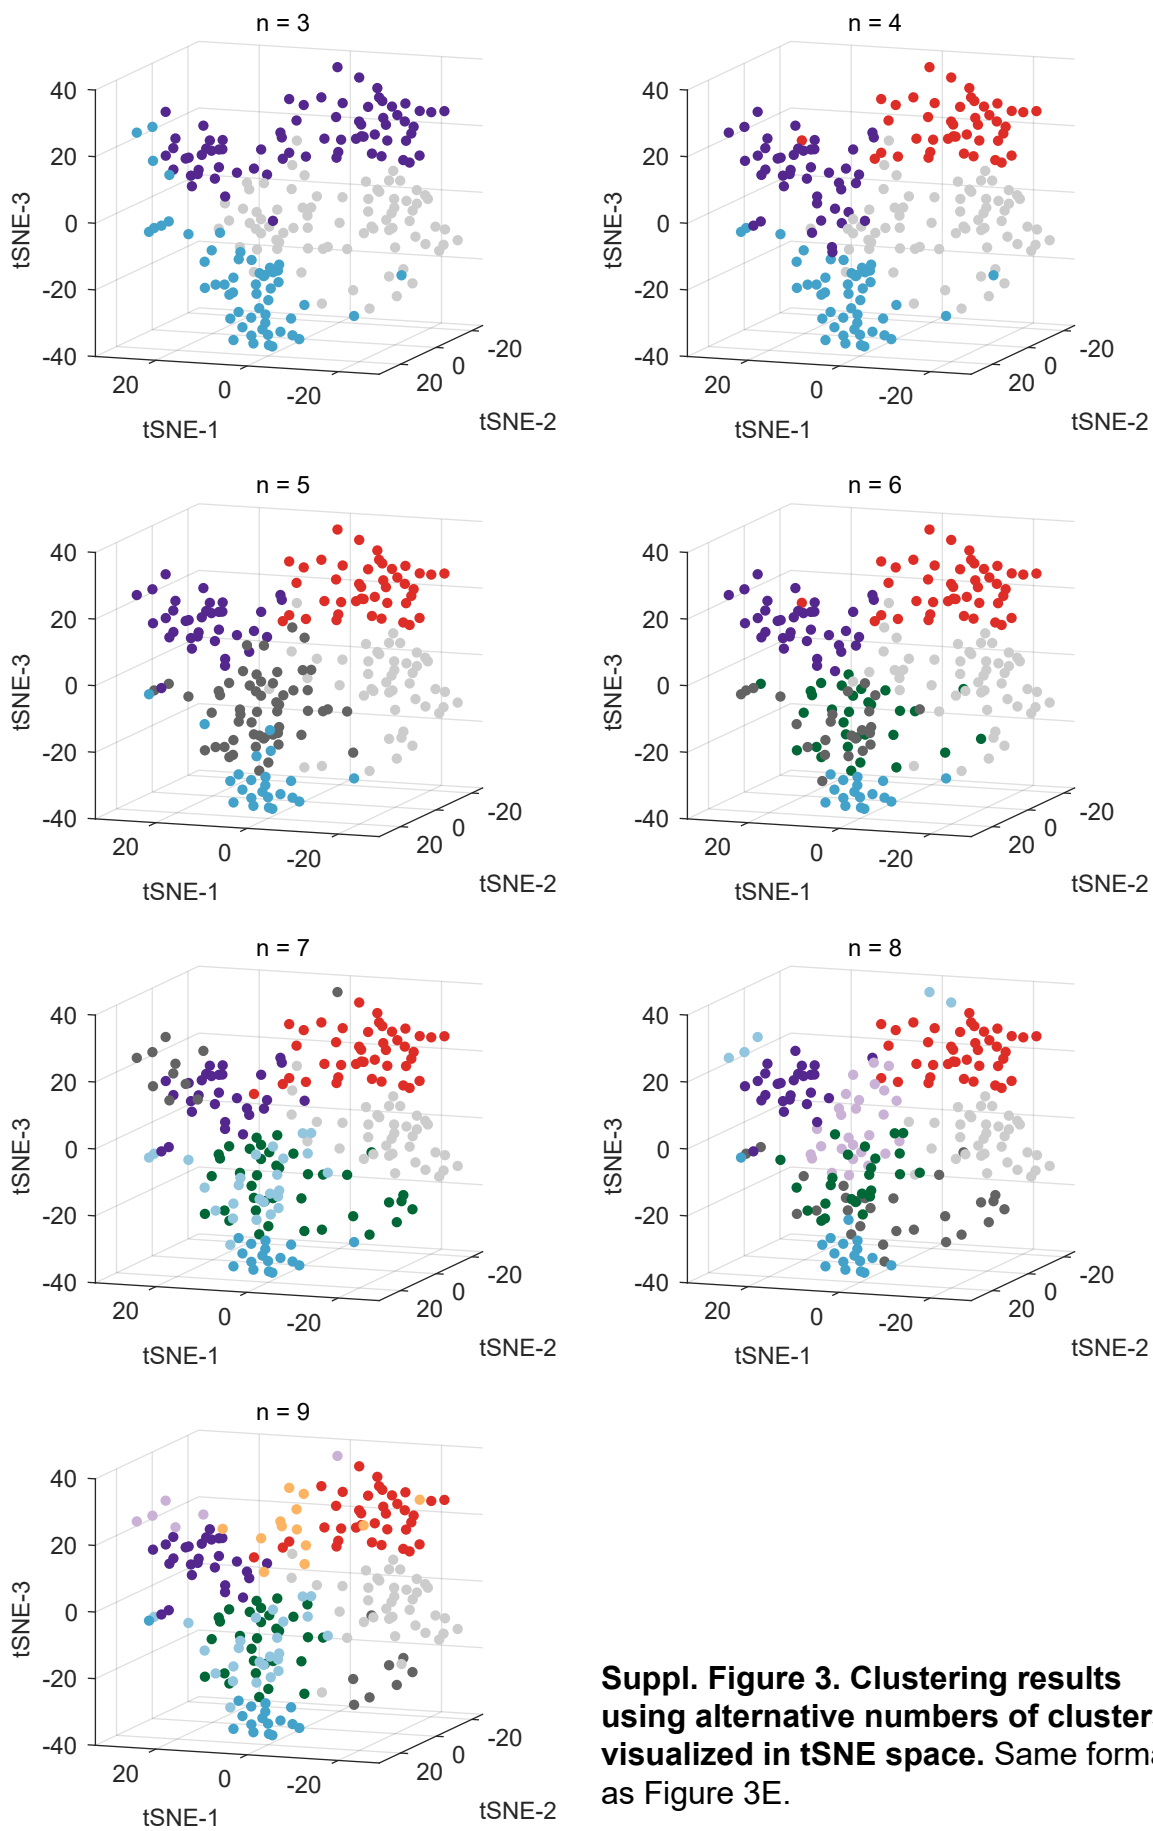

**Suppl. Figure 3. Clustering results using alternative numbers of clusters, visualized in tSNE space. Same format as Figure 3E.**

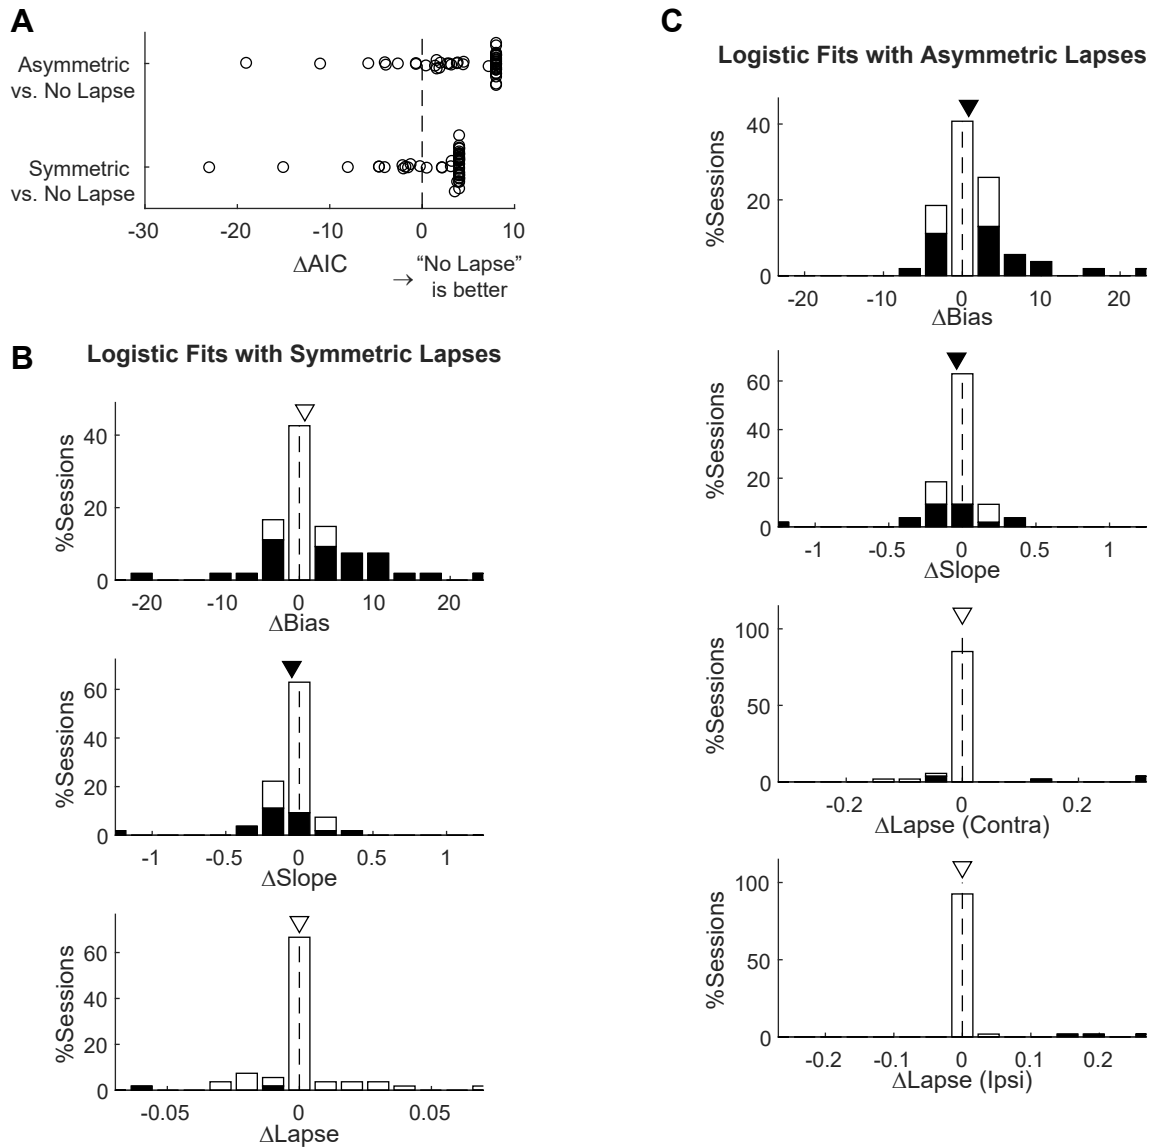

**Suppl Figure 4. Comparison of different logistic models.** A, The No Lapse model was associated with the lowest AIC for most sessions. The Symmetric Lapse model was associated with lower AICs for 12 sessions. The Asymmetric Lapse model was associated with lower AICs for 8 sessions. B, Histograms of microstimulation effects on bias, slope, and lapse terms in the Symmetric Lapse model. C, Histograms of microstimulation effects on bias, slope, and two lapse (for each choice) terms in the Asymmetric Lapse model. Same format as the histograms in Figure 6A.

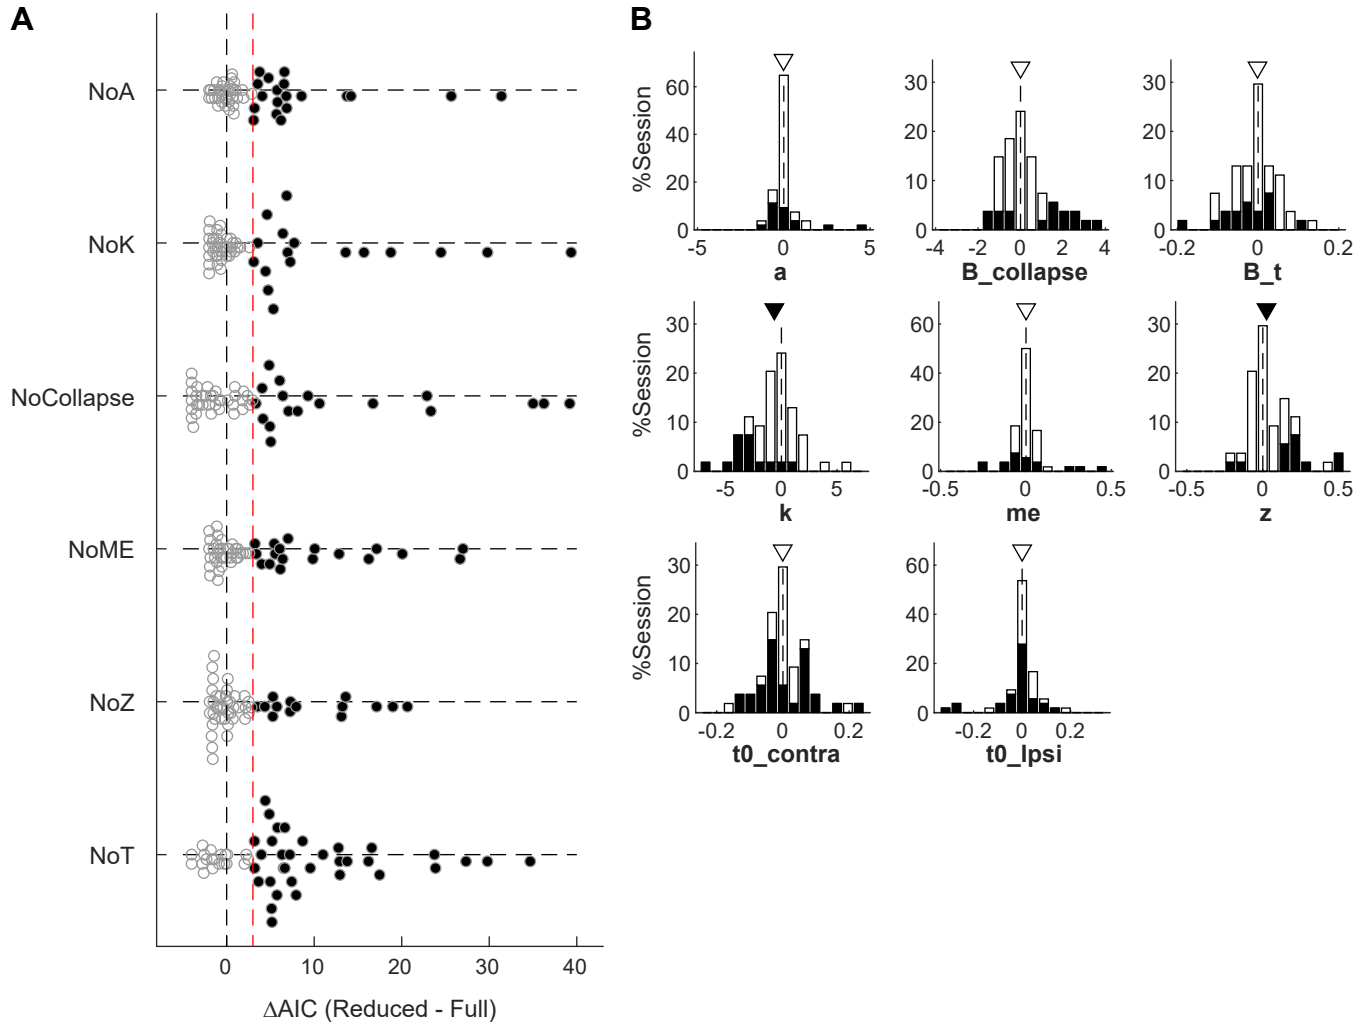

**Suppl Figure 5.** A, Differences in AIC between reduced and Full models. Filled circles indicate sessions for which  $AIC_{\text{Reduced}} - AIC_{\text{Full}} > 3$  (red line). Note that for three sessions, the Full model outperformed the None model but not any of the reduced models. B, Histograms of difference in DDM parameters between trials with and without microstimulation. Filled bars represent sessions considered to show significant microstimulation effects on the given parameter, based on AIC comparisons. Triangles indicate median values. Filled triangles: Wilcoxon sign-rank test,  $p < 0.05$ .
